1 **Regulation of the Unfolded Protein Response by BiP AMPylation**  
2 **protects photoreceptors from light-dependent degeneration.**

3  
4 Andrew T. Moehlman<sup>1</sup>, Amanda K. Casey<sup>2</sup>, Kelly Servage<sup>2,3</sup>, Kim Orth<sup>2,3\*</sup>, Helmut Krämer<sup>1,4\*</sup>

5  
6  
7 **Affiliations:**

8 <sup>1</sup>Department of Neuroscience, UT Southwestern Medical Center, Dallas, TX.

9 <sup>2</sup>Department of Molecular Biology UT Southwestern Medical Center, Dallas, TX.

10 <sup>3</sup>Department of Biochemistry, UT Southwestern Medical Center, Dallas, TX and Howard  
11 Hughes Medical Institute, Dallas, TX.

12 <sup>4</sup>Department of Cell Biology, UT Southwestern Medical Center, Dallas, TX.

13  
14 \*Correspondence to:

15 [Helmut.Kramer@UTSouthwestern.edu](mailto:Helmut.Kramer@UTSouthwestern.edu),

16 [Kim.Orth@utsouthwestern.edu](mailto:Kim.Orth@utsouthwestern.edu)

17

18

## 19 **Abstract**

20 In response to environmental, developmental, and pathological stressors, cells engage  
21 homeostatic pathways to maintain their function. Among these pathways, the Unfolded Protein  
22 Response protects cells from the accumulation of misfolded proteins in the ER. Depending on  
23 ER stress levels, the ER-resident Fic protein catalyzes AMPylation or de-AMPylation of BiP, the  
24 major ER chaperone and regulator of the Unfolded Protein Response. This work elucidates the  
25 importance of the reversible AMPylation of BiP in maintaining the *Drosophila* visual system in  
26 response to stress. After 72 hours of constant light, photoreceptors of *fic*-null and AMPylation-  
27 resistant *BiP*<sup>T366A</sup> mutants, but not wild-type flies, display loss of synaptic function,  
28 disintegration of rhabdomeres, and excessive activation of ER stress reporters. Strikingly, this  
29 phenotype is reversible: photoreceptors regain their structure and function within 72 hours once  
30 returned to a standard light:dark cycle. These findings show that Fic-mediated AMPylation of  
31 BiP is required for neurons to adapt to transient stress demands.

32

33

## 34 **Introduction**

35 Post-translational modifications (PTMs) of proteins are important for rapid responses to  
36 environmental challenges of cells. One such PTM is AMPylation, the reversible addition of  
37 adenosine monophosphate (AMP) to hydroxyl groups (also known as adenylation) (Brown et  
38 al., 1971; Casey & Orth, 2018; Kingdon et al., 1967; Woolery et al.). AMPylation is catalyzed by  
39 at least two protein families, among them the conserved Fic-domain proteins (Casey & Orth,  
40 2018; Harms et al., 2016). Eukaryotic Fic, an ER-resident type-II membrane protein (Rahman et  
41 al., 2012), AMPylates BiP (GRP78), a highly conserved and ubiquitous ER chaperone (Ham et

42 al., 2014; Preissler et al., 2015). Working together with a multitude of associated quality control  
43 proteins, BiP is critical for the translocation, folding, and secretion of proteins from the ER as  
44 well as for aiding in the clearing of misfolded ER aggregates and degradation of membrane-  
45 associated proteins (Hendershot et al., 1988; Kozutsumi et al., 1988; Meunier et al., 2002). BiP is  
46 both a mediator and transcriptional target of the Unfolded Protein Response (UPR), a  
47 coordinated cell signaling pathway that is activated during times of high misfolded protein levels  
48 in the ER. Like many protein chaperones, BiP depends on its ATPase activity to undergo a  
49 conformational change to bind to its substrates (Gaut & Hendershot, 1993). AMPylation locks  
50 BiP into a state resembling the ATP-bound conformation with high substrate off-rates, thereby  
51 inhibiting its chaperone function (Preissler, Rohland, et al., 2017; Wieteska et al., 2017).

52 In agreement with this PTM's inhibitory role, BiP AMPylation levels are linked to  
53 protein homeostasis (Ham et al., 2014). Reduction of ER protein load promotes Fic-mediated  
54 AMPylation of BiP, whereas Fic catalyzes the deAMPylation of BiP under elevated ER stress  
55 conditions (Ham et al., 2014; Preissler et al., 2015). This switch in Fic's activity is linked to a  
56 key regulatory salt bridge in eukaryotic Fic. Mutations in Fic that disrupt this salt bridge result in  
57 an overactive AMPylator that lacks deAMPylation activity (Casey et al., 2017; Preissler, Rato, et  
58 al., 2017). Together, these studies suggest a model in which BiP is AMPylated in times of low  
59 ER stress, creating a reserve pool of inactive BiP that can be readily activated to respond to  
60 changes of ER homeostasis (**Figure 1A**). This reserve pool of BiP is proposed to act as a buffer  
61 to attenuate or shorten the need for a more dramatic activation of the transcriptional and  
62 translational arms of the UPR (Casey et al., 2017; Preissler, Rato, et al., 2017; Wieteska et al.,  
63 2017). However, the physiological importance of endogenous Fic-mediated AMPylation for  
64 remains unclear.

65           In the fruit fly, *Drosophila melanogaster*, we previously demonstrated that *fic*-null  
66 mutants harbor a defect in visual signaling, as assessed by electroretinogram (ERG). The well-  
67 characterized *Drosophila* visual system has proven a valuable model for many fields, such as  
68 neuroscience (Borycz et al., 2002; Sugie et al., 2015), cell signaling (Dolph et al., 1993; Scott et  
69 al., 1995), protein trafficking (Akbar et al., 2009; Lee et al., 2003), and neurodegeneration  
70 (Johnson et al., 2002; Leonard et al., 1992; Ryoo et al., 2007). The specialized photoreceptor  
71 cells possess tightly packed microvilli-like membranes, termed rhabdomeres, that endow  
72 remarkable sensitivity to minute changes in light conditions (Montell, 2012). The ability to  
73 maintain this sensitivity is critical for flight behavior, foraging, and escape from predators. Thus,  
74 under a wide range of conditions, photoreceptors must maintain their light detection cascade,  
75 which requires the constant production, trafficking, and degradation of proteins through the  
76 endomembrane system (Colley et al., 1995; Kiselev et al., 2000; Rosenbaum et al., 2006).

77           We postulated that as a regulator of proteostasis and the UPR, BiP must be tightly  
78 regulated for proper maintenance of vision in the fly. Here we demonstrate that mutants lacking  
79 AMPylation of BiP at a specific residue, Thr366, possess the same ERG defect as *fic*-null  
80 animals, implicating BiP as the target of Fic necessary for visual signaling. We go on to find that  
81 application of an eye-specific stress, constant light, leads to exaggerated electrophysiology  
82 defects and the loss of photoreceptor rhabdomeres, akin to neurodegeneration. However, these  
83 defects exhibit a remarkable and unique reversibility: structural and functional phenotypes  
84 observed in light-stressed *fic*-null and AMPylation-resistant *BiP*<sup>T366A</sup> mutants are reversed after  
85 the flies are returned to a standard light/dark cycle. In addition, we identify changes in the  
86 regulation of UPR during constant light stress in these mutants, implicating ER dysregulation as  
87 the cause of the inability to adapt to altered light conditions.

88

## 89 **Results**

### 90 ***BiP*<sup>T366A</sup> rescues over-expression of constitutively active AMPylating Fic<sup>E247G</sup>**

91 To test the hypothesis that BiP is a critical target of Fic AMPylation *in vivo* (**Figure 1A**),  
92 we designed and generated transgenes expressing wild-type and AMPylation-resistant FLAG-  
93 tagged BiP proteins under control of the endogenous BiP promoter (**Figure 1- figure**  
94 **supplement 1A**). *BiP* null fly mutants die early in development; this lethality is rescued by  
95 including a copy of the genomic transgene expressing FLAG-BiP<sup>WT</sup> or the AMPylation-resistant  
96 FLAG-BiP<sup>T366A</sup> mutant (**Figure 1B**). We will refer to these rescued flies as *BiP*<sup>WT</sup> or *BiP*<sup>T366A</sup>,  
97 respectively. In contrast, a BiP transgene mutated at a second reported AMPylation site (Casey et  
98 al., 2017; Preissler et al., 2015), BiP<sup>T518A</sup>, did not rescue *BiP*<sup>-/-</sup> lethality. As *fic* null mutants that  
99 lack BiP AMPylation are viable, the lethality of the *BiP*<sup>T518A</sup> mutant is not likely to be due to the  
100 loss of AMPylation (Casey et al., 2017). Instead, these observations indicate an essential role for  
101 Thr<sup>518</sup> in BiP's chaperone activity. Consistent with this notion, the equivalent residue, Thr<sup>538</sup>, in  
102 the *S. cerevisiae* BiP homolog Kar2 is required for survival under heat stress even though yeast  
103 lack both Fic domain proteins and BiP AMPylation (**Figure 1- figure supplement 1B**).

104 Previously, we reported that over-expression of the constitutively active AMPylating  
105 Fic<sup>E247G</sup> was lethal in a *fic*-null fly background (*fic*<sup>30C</sup>) because it lacks the essential  
106 deAMPylation activity (Casey et al., 2017). We tested whether flies expressing the AMPylation-  
107 resistant BiP<sup>T366A</sup> could survive this lethality. Consistent with previous findings, we observe  
108 over-expression of the mutant UAS-Fic<sup>E247G</sup> transgene using the ubiquitous *Da*-Gal4 driver was  
109 lethal in an otherwise *fic*-null animal (**Figure 1C**). Lethality of the constitutively active  
110 AMPylating Fic<sup>E247G</sup> was suppressed in flies expressing the AMPylation-resistant BiP<sup>T366A</sup> but

111 not BiP<sup>WT</sup> (**Figure 1C**). These results indicate that Thr<sup>366</sup> of BiP is a physiologically relevant  
112 AMPylation target *in vivo*.

113

### 114 **The UPR protects eyes from overactive AMPylation**

115 To test the interaction between Fic-mediated AMPylation and the UPR, we employed an  
116 eye-specific Fic gain-of-function model. Eye-specific expression of the constitutively active  
117 AMPylating UAS-Fic<sup>E247G</sup> transgene using a LongGMR-Gal4 driver in otherwise *fic*-null  
118 animals results in a severe rough-eye defect (Casey et al., 2017). However, in a *fic* heterozygous  
119 background, eye-specific expression of constitutively active AMPylating Fic<sup>E247G</sup> yields only a  
120 mildly rough eye (**Figure 2A**). We used this intermediate phenotype to assess genetic  
121 interactions between Fic<sup>E247G</sup> and components of the UPR with a candidate-based targeted RNAi  
122 screen (**Table 1**). Fic<sup>E247G</sup>-induced eye roughness was significantly enhanced by knockdown of  
123 the key UPR components *Perk*, *Atf4*, and *Irel* (**Figure 2C-E** and **Table 1**), but not *ATF6* (**Figure**  
124 **2B**). Furthermore, *Xbp1* knockdown in conjunction with Fic<sup>E247G</sup> expression was lethal (**Figure**  
125 **2F**). By contrast, knockdown of these UPR genes in the absence of Fic<sup>E247G</sup> did not influence  
126 eye phenotype or fly survival (**Figure 2A'-F'**). These genetic interactions suggest a role for UPR  
127 signaling in mitigating cellular stress imposed by expressing the constitutively active  
128 AMPylating Fic<sup>E247G</sup> in the eye.

129

### 130 **AMPylation of BiP is necessary for maintaining vision**

131 The findings that BiP is a target of Fic *in vivo* and that silencing UPR pathway  
132 components enhances the severity of the constitutively active AMPylating Fic<sup>E247G</sup>-induced  
133 rough-eye phenotype prompted us to assay the physiological effects of cellular stress in flies

134 lacking BiP AMPylation. To do this we utilized flies that are either null for *fic* (*fic*<sup>30C</sup>) or express  
135 the AMPylation-resistant BiP<sup>T366A</sup> instead of wild-type BiP. By using this strategy, we are able to  
136 discern BiP AMPylation-specific changes from other potential changes that are due to as-yet-  
137 unknown targets of Fic AMPylation.

138 As previously reported in ERG recordings, *fic*-null flies display a reduction of the initial  
139 response (termed the ON Transient, Figure 3A) to a light pulse compared to wild-type controls.  
140 Interestingly, *BiP*<sup>T366A</sup>, but not *BiP*<sup>WT</sup> flies, exhibited the same defect in ON Transients as *fic*<sup>30C</sup>  
141 mutants, consistent with BiP being the primary target of Fic AMPylation required for proper  
142 visual neurotransmission (**Figure 1- figure supplement 2**). Of note, we used an eye-specific  
143 RNAi construct against *white* to minimize any effect of the *mini-white* gene used as a marker in  
144 these BiP transgenes. When we compared ERG traces of *fic*<sup>30C</sup> and *BiP*<sup>T366A</sup> flies in *white*<sup>+</sup> (red  
145 eyed) backgrounds, the reductions in ON transients were no longer detectable (**Figure 1- figure**  
146 **supplement 3**). This is likely due to the previously established protective effect provided by the  
147 red pigment in *white*<sup>+</sup> flies. Indeed, a similar *white*-dependent phenotype has been reported for  
148 photoreceptor synaptic plasticity after prolonged light exposure (Damulewicz et al., 2017; Sugie  
149 et al., 2015), consistent with previous observations that a functional *white* gene masks some  
150 degenerative phenotypes in the retina (Lee & Montell, 2004; Soukup et al., 2013). Therefore, we  
151 used the *white*-eyed flies (referred to as *w*<sup>1118</sup>) to test whether AMPylation may play a role in this  
152 type of photoreceptor plasticity, which is induced by rearing flies in uninterrupted low light for  
153 72 hours (Damulewicz et al., 2017; Sugie et al., 2015).

154 We conducted ERG recordings under different light conditions with four fly lines, *w*<sup>1118</sup>,  
155 *fic*<sup>30C</sup>, *BiP*<sup>WT</sup> and *BiP*<sup>T366A</sup> (**Figure 3B**). Compared to age-matched siblings reared under the  
156 standard 12 hr Light:12 hr Dark (LD) treatment, *fic*<sup>30C</sup> and *BiP*<sup>T366A</sup> flies reared for three days

157 under continuous light (LL) at 500 lux exhibited severe ERG defects. This included reduction in  
158 the sustained negative potential (SNP), a measure of photoreceptor activation, and loss of ON  
159 and OFF transients, which reflect synaptic transmission to downstream L1/L2 lamina neurons  
160 (**Figure 3C & D**). Wild-type controls maintained healthy OFF transients following LL, but ON  
161 transients were reduced, reflecting the sensitivity of this component to various light conditions  
162 (**Figure 3D**). To test for behavioral consequences, we assayed  $w^{1118}$  and  $fic^{30C}$  flies after 72 hours  
163 of LD or LL treatment for light-induced startle behavior using single-fly activity chambers (Ni et  
164 al., 2017). Following a 5-min light pulse, LD-reared  $fic^{30C}$  flies exhibited a startle response  
165 indistinguishable from control  $w^{1118}$  flies, whereas  $fic^{30C}$  flies, but not  $w^{1118}$  flies, failed to  
166 respond to the light pulse after 72 hours of LL (**Figure 3- figure supplement 1**). Thus, Fic-  
167 mediated AMPylation is required to maintain vision acuity under LL conditions.

168 We next designed experiments to test whether these functional ERG changes in flies  
169 lacking AMPylation reflected light-induced neurodegeneration or a failure to adapt to constant  
170 stimulation. First, we asked if the LL-induced ERG defects of  $BiP^{T366A}$  and  $fic^{30C}$  flies were  
171 reversible. We reared mutant and control flies for 72 hours in LL followed by 72 hours of  
172 recovery in LD (referred to as “Rec”; **Figure 3B**). This recovery period was sufficient to restore  
173 both healthy OFF transients and SNPs in  $BiP^{T366A}$  and  $fic^{30C}$  flies (**Figure 3C & D**). Second, we  
174 asked if the intensity of the light would exaggerate the defects of  $BiP^{T366A}$  and  $fic^{30C}$  flies.  
175 Exposure of mutant or control flies with 5000 lux, instead of 500 lux, did not alter the severity of  
176 ERG defects, indicating the changes were not simply a reflection of the increased amount of total  
177 light exposure during LL treatment (**Figure 3- figure supplement 2**). Third, we asked if  
178 prolonging the LL stress would alter the reversibility of these defects. Mutant flies reared under  
179 LL for ten days retained the capability to recover healthy ERG traces after only three days on



180 LD, indicating that photoreceptors are not dying but maintained during prolonged light stress  
181 **(Figure 3- figure supplement 3)**. Together, these data support a model for a dysregulated  
182 adaptive response, rather than phototoxicity, inducing the reversible loss of OFF transients and  
183 reduced SNPs.

184

### 185 **Constant light induces severe but reversible morphological defects in AMPylation mutants**

186 To determine if the underlying eye substructures were being altered in these AMPylation  
187 deficient mutants, we performed TEM on ultrathin transverse eye sections. Under LD conditions,  
188 *fic*<sup>30C</sup> and *BiP*<sup>T366A</sup> mutant and wild-type controls appeared indistinguishable **(Figure 4A)**.  
189 However, following 72 hours of LL (500 lux), *fic*<sup>30C</sup> and *BiP*<sup>T366A</sup> mutants, but not *w*<sup>1118</sup> and  
190 *BiP*<sup>WT</sup> controls, displayed severe defects in the integrity of rhabdomeres, the microvilli-like  
191 membrane structures that house the phototransduction cascade **(Figure 4B)**. After a three-day  
192 recovery at LD, the rhabdomeres were nearly restored in both AMPylation-deficient mutants  
193 **(Figure 4C)**. To quantify these structural changes in large cohorts of flies, we assessed flies for  
194 the presence of wild-type “deep pseudopupils” (DPP) **(Figure 4D)**. Visualization of the DPP  
195 affords an assessment of rhabdomere structural integrity in living flies (Franceschini &  
196 Kirschfeld, 1971). Consistent with the TEM data, 3 days of LL caused loss of DPP in *fic*<sup>30C</sup> and  
197 *BiP*<sup>T366A</sup>, and DPPs returned after a 3-day recovery **(Figure 4D)**. This suggests that proper  
198 regulation of BiP through AMPylation is required for maintaining both function and structure of  
199 photoreceptor cells.

200

## 201 **Fic regulates ER stress signaling in the retina and lamina neuropil**

202           Given the unique role of Fic in both AMPylating and deAMPylating BiP to modulate its  
203 chaperone activity and maintaining ER homeostasis, we evaluated *fic*<sup>30C</sup> flies for changes in the  
204 UPR under LD, LL, and Rec conditions. First, we performed immunohistochemistry against BiP,  
205 a transcriptional target of the UPR, which is upregulated during states of ER stress (Gardner et  
206 al., 2013; Ham et al., 2014). After 3 days of LL, sections of *fic*<sup>30C</sup> revealed increased levels of  
207 BiP in retinas and in the lamina neuropils where photoreceptor axons form synapses onto lamina  
208 neurons. BiP levels returned to control levels following three days of recovery (**Figure 5A & B**).  
209 To further assess UPR signaling in these tissues, we utilized a sensor for Ire1-mediated Xbp1  
210 splicing (Sone et al., 2013) and an Atf4 translational reporter which serves as a proxy for Perk-  
211 mediated phosphorylation of eIF-2a (Kang et al., 2015). In wild-type flies, Xbp1-GFP was  
212 slightly induced in the lamina after 24 hours of LL in wild-type flies and the signal decreased  
213 over time (**Figure 5C, top row, & 5D**). However, in *fic*<sup>30C</sup> flies, the Xbp1-GFP signal in the  
214 lamina continued to increase after 48 hours of LL and remained elevated after 72 hours (**Figure**  
215 **bottom row, & 5D**). In the retina, control flies showed little to no increase of Xbp1-GFP levels,  
216 while *fic*<sup>30C</sup> flies showed a significant transient increase after one and two days LL. With the  
217 Atf4-DsRed reporter, we observed a significant increase of signal in both the retina and lamina  
218 of wild-type flies after one day, but no difference in *fic*<sup>30C</sup> mutants at one or two days LL when  
219 compared to LD controls (**Figure 5E & F**). However, by three days of LL, Atf4-DsRed reporter  
220 activity in the wild-type flies returned to control levels, while the *fic*<sup>30C</sup> mutants showed a  
221 significant increase in both the retina and lamina neuropil (**Figure 5E & F**). These changes in  
222 UPR signaling were reversible as each of the reporters returned to near control intensity after  
223 72 hours of LD recovery (**Figure 5A, C & E, last columns**). The elevated UPR response in

224 *fic*<sup>30C</sup> mutants correlated with the timing of the observed severe defects in the integrity of  
225 rhabdomeres (**Figure 4B**). Together, these data identify a crucial role for Fic-mediated BiP  
226 AMPylation in regulating UPR signaling during homeostatic responses of photoreceptor  
227 neurons.

228

## 229 **Discussion**

230 Here we demonstrate that BiP is a critical *in-vivo* target of Fic-mediated AMPylation, as  
231 an AMPylation-resistant BiP blocks over-expressed constitutively active AMPylating Fic<sup>E247G</sup>  
232 lethality and recapitulates *fic*-null vision defects. This work also sheds light on a novel  
233 physiological role for AMPylation/deAMPylation control of BiP: fine-tuning UPR signaling to  
234 allow for visual system adaptation. We observe genetic interactions with the constitutively active  
235 AMPylating Fic<sup>E247G</sup> and the UPR sensors Ire1 and PERK as well as their effectors, perhaps due  
236 to the critical role of BiP as both a regulator (Amin-Wetzel et al., 2017; Bertolotti et al., 2000;  
237 Carrara et al., 2015; Shen et al., 2005) and downstream transcriptional target of the UPR (Ham et  
238 al., 2014; Kozutsumi et al., 1988). Indeed, we hypothesize that unregulated Fic<sup>E247G</sup>, in the  
239 absence of deAMPylation activity, AMPylates excess BiP, excluding it from its normal  
240 chaperone role and leading to cell death (Casey et al., 2017; Truttmann et al., 2017). In support  
241 of this hypothesis, the developmental defects due to excessive unregulated AMPylation are  
242 suppressed by AMPylation-resistant BiP<sup>T366A</sup>. Furthermore, the enhancement of the rough-eye  
243 Fic<sup>E247G</sup> phenotype by knockdown of the Ire1 and PERK pathways suggest a protective role for  
244 the UPR, perhaps through the known effects on translation by Ire1-mediated decay of mRNA,  
245 Xbp1-driven transcription or PERK-mediated phosphorylation of eIF-2a (Gardner et al., 2013).

246 Our work supports an *in-vivo* requirement for Fic-mediated AMPylation of BiP<sup>T366</sup> in the  
247 context of long-term adaptation to prolonged light exposure. BiP<sup>T366</sup> replacement mutants  
248 phenocopy *fic*-null flies in both the light-induced blindness and the unexpected recovery from  
249 this phenotype. These functional changes are mirrored in the structural changes of photoreceptor  
250 rhabdomeres. Rhabdomere appearance of AMPylation deficient flies was reminiscent of retinal  
251 degeneration mutants (Ryoo et al.; Smith et al., 1991), however the remarkable recovery of the  
252 tissue structure in three days is unlike any reported retinal degeneration phenotype. Together,  
253 this work demonstrates a seminal role for Fic-mediated AMPylation of BiP *in vivo*: enabling  
254 photoreceptors to adapt and maintain both structural and functionality integrity during periods of  
255 prolonged stress due to uninterrupted light stimulation. The exact mechanism through which  
256 these defects in *fic* mutants arise remains undetermined, but previous studies have demonstrated  
257 a requirement for maintaining normal ER folding and trafficking of transmembrane visual  
258 signaling components, such as Rhodopsin (Colley et al., 1995; Rosenbaum et al., 2006). This  
259 intense demand for proper ER stress regulation sensitizes the eye to otherwise mild defects in *fic*  
260 mutants, and the additional demands posed by the stress of constant light stimulation.

261 We also observed that loss of BiP AMPylation deregulates, but does not block, the UPR  
262 to this physiological stress. This observation supports previous claims that AMPylation and  
263 deAMPylation of BiP aids in maintaining ER homeostasis (**Figure 1A**) by establishing a reserve  
264 pool of BiP that can readily be deAMPyated in response to acute ER insults (Casey et al., 2017;  
265 Ham et al., 2014; Preissler, Rato, et al., 2017). This regulation would allow for fine-tuning of the  
266 UPR response under specific contexts, comparable to findings in *C. elegans* in which *fic-1* and  
267 *hsp3* (a BiP homologue) mutants are sensitive to bacterial infection (Truttmann et al., 2016). We  
268 speculate that the eye requires tight control of BiP activity and suppression of UPR signaling, to

269 facilitate adaptation of the vision signaling cascade. Under standard LD conditions, only slight  
270 differences are observed, presumably because ER stress is low (**Figure 5C & D, 1<sup>st</sup> column**).  
271 However, exposure to constant light results in ER stress and UPR signaling, which wild-type  
272 flies can clear, presumably because there is a reserve pool of AMPylated BiP to rapidly respond  
273 to the stress. In *fic* mutants, we speculate, loss of the reserve BiP results in the UPR  
274 dysregulation revealed by the Ire1 and PERK activity reporters (**Figure 5C & D**) as a larger  
275 proportion of BiP would be previously engaged and not able to respond to the extra stress.  
276 Additionally, the prolonged UPR response in the eyes with dysregulated AMPylation may result  
277 in increased expression of UPR-regulated proteins while blocking production of the visual  
278 signaling components necessary for adapting to transient stress.

279 BiP expression is subject to multiple levels of feedback regulation and is induced when  
280 the UPR is activated (Kozutsumi et al., 1988; Ma & Hendershot, 2003). However, in a negative  
281 feedback loop, BiP also inhibits activation of the UPR sensors Ire1, PERK, and Atf6, through  
282 direct binding (Bertolotti et al., 2000; Shen et al., 2005). It remains unknown how AMPylation  
283 affects the interactions of BiP with these proteins *in vivo*; however, *in-vitro* work suggests that  
284 AMPylation of BiP abolishes its inhibitory effect on Ire1 dimerization and activation (Amin-  
285 Wetzl et al., 2017). We speculate that the loss of BiP AMPylation/deAMPylation cycle in a *fic*  
286 null affects both the ability of BiP to quickly respond to misfolded protein aggregates and to  
287 regulate UPR activation. Future studies on the dynamic role of reversible BiP AMPylation and  
288 its interaction with downstream UPR sensors should provide unique insight into neuronal  
289 plasticity and regeneration.

290

## 291 **Materials and Methods**

### 292 **Fly stocks and genetics**

293 Bloomington Stock Center provided *w*<sup>1118</sup> (BS# 3605), *BiP*<sup>G0102</sup>/*FM7c* (BS#11815), *Da-*  
294 *Gal4* (BS#55850), *LongGMR-Gal4* (BS#8121) stocks. The *fic*<sup>30C</sup> allele and UAS-*Fic*<sup>E247G</sup> flies  
295 was previously described (Casey et al., 2017). Lines used in the RNAi screen are described in  
296 Table S1 and were obtained from Bloomington Stock Center and the Vienna Drosophila  
297 Resource Center (Dietzl et al., 2007). The *Atf4*<sup>5'UTR</sup>-*dsRed* (Kang et al., 2015) and the *Xbp1-*  
298 *GFP* (Sone et al., 2013) lines were a gift from Dr. Don Ryoo (NYU) and were recombined with  
299 the *fic*<sup>30C</sup> allele. We generated the p[gen3xFLAG-BiP<sup>WT</sup>]<sup>AttP-89E11</sup>, p[gen3xFLAG-BiP<sup>T366A</sup>]<sup>AttP-</sup>  
300 <sup>89E11</sup>, p[gen3xFLAG-BiP<sup>T518A</sup>]<sup>AttP-89E11</sup> and p[*GMR-dsRNA*<sup>white</sup>] alleles using the Phi30C  
301 integrase strategy (Venken et al., 2006). p[*GMR-dsRNA*<sup>white</sup>] was recombined with the *fic*<sup>30C</sup>  
302 allele and white-eyed candidates were screened for the *fic* allele by PCR. *BiP*<sup>G0102</sup>;;  
303 p[gen3xFLAG-BiP<sup>WT</sup>]<sup>AttP-89E11</sup> and *BiP*<sup>G0102</sup>;;p[gen3xFLAG-BiP<sup>T366A</sup>]<sup>AttP-89E11</sup> stocks were made  
304 by crossing males harboring the genomic transgene to *BiP*<sup>G0102</sup>/*FM7c* female flies. Surviving  
305 males were backcrossed to *BiP*<sup>G0102</sup>/*FM7c* female flies, and stable stocks were established from  
306 the resulting progeny. None of the rare escaping *BiP*<sup>G0102</sup>;; p[gen3xFLAG-BiP<sup>T518A</sup>]<sup>AttP-89E11</sup>  
307 male flies were fertile. The *LongGMR-Gal4*, UAS<sup>Scer</sup>-V5-*Fic*<sup>E247G</sup>-*attP-B3*/TM6B,Hu and *Da-*  
308 *Gal4*, UAS<sup>Scer</sup>-V5-*Fic*<sup>E247G</sup>-*attP-B3*/TM6B,hu stocks were made using standard Drosophila  
309 recombination and crossed into *w*<sup>1118</sup> and *w*<sup>1118</sup>; *fic*<sup>30C</sup> backgrounds.

310

### 311 **List of flies strains and stocks used**

312 *w*<sup>1118</sup> (BS#3605)

313 OreR

314 ; *fic*<sup>30C</sup>  
315 *w*<sup>1118</sup> ; *fic*<sup>30C</sup>  
316 *w*<sup>1118</sup> ; p[*GMR*-dsRNA<sup>white</sup>]  
317 *w*<sup>1118</sup> ; *fic*<sup>30C</sup> , p[*GMR*-dsRNA<sup>white</sup>]  
318 *w*<sup>1118</sup> ; *fic*<sup>30C</sup> ; *LongGMR*-Gal4,UAS<sup>Scer</sup>-V5-Fic<sup>E247G</sup>- attP-B3/TM6B,hu  
319 *w*<sup>1118</sup> ; *fic*<sup>30C</sup>/CyO ; *Da*-Gal4,UAS<sup>Scer</sup>-V5-Fic<sup>E247G</sup>- attP-B3/TM6B,hu  
320 *BiP*<sup>G0102</sup>/FM7c (BS#11815)  
321 *w*<sup>1118</sup>;; p[gen3xFLAG-BiP<sup>WT</sup>]AttP-89E11  
322 *w*<sup>1118</sup>;; p[gen3xFLAG-BiP<sup>T366A</sup>]AttP-89E11  
323 *w*<sup>1118</sup>;; p[gen3xFLAG-BiP<sup>T518A</sup>]AttP-89E11  
324 *w*<sup>1118</sup> ; *fic*<sup>30C</sup> ; p[gen3xFLAG-BiP<sup>WT</sup>]AttP-89E11  
325 *w*<sup>1118</sup> ; *fic*<sup>30C</sup> ; p[gen3xFLAG-BiP<sup>T366A</sup>]AttP-89E11  
326 *w*<sup>1118</sup> ; *fic*<sup>30C</sup> ; p[gen3xFLAG-BiP<sup>T518A</sup>]AttP-89E11  
327 *BiP*<sup>G0102</sup> ;; p[gen3xFLAG-BiP<sup>WT</sup>]AttP-89E11  
328 *BiP*<sup>G0102</sup> ;; p[gen3xFLAG-BiP<sup>T366A</sup>]AttP-89E11  
329 *BiP*<sup>G0102</sup> ; p[*GMR*-dsRNA<sup>white</sup>]; p[gen3xFLAG-BiP<sup>WT</sup>]<sup>89E11</sup>  
330 *BiP*<sup>G0102</sup> ; p[*GMR*-dsRNA<sup>white</sup>]; p[Attb\_gen3xFLAG-BiP<sup>T366A</sup>]<sup>89E11</sup>  
331 *w*<sup>1118</sup> ; p[*tub-Atf4*<sup>5'UTR</sup>-dsRed]/p[*GMR*-dsRNA<sup>white</sup>]  
332 *w*<sup>1118</sup> ; *fic*<sup>30C</sup>,p[*tub-Atf4*<sup>5'UTR</sup>-dsRed]/*fic*<sup>30C</sup>,p[*GMR*-dsRNA<sup>white</sup>]  
333 *w*<sup>1118</sup> ; p[*GMR*-dsRNA<sup>white</sup>]; p[*Da*-Gal4]/p[UAS<sup>Scer</sup>-Xbp1-GFP.hg]  
334 *w*<sup>1118</sup> ; *fic*<sup>30C</sup>,p[*GMR*-dsRNA<sup>white</sup>]; p[*Da*-Gal4]/p[UAS<sup>Scer</sup>-Xbp1-GFP.hg]  
335

336 **Generation of genomic BiP transgenes**

337 BiP cDNA sequence were subcloned into a pAttB vector and a 3X-FLAG tag was  
338 inserted after the N-terminal signal sequence. To create the T366A and T518A mutations,  
339 gBlocks (IDT, Coralville, IA) for the mutant sequences were synthesized and subcloned into the  
340 pAttB\_genomic BiP vector via NEB HiFi Assembly Kit (NEB, Ipswich, MA). These constructs  
341 were sequence-verified and injected into embryos (BestGene, Chino Hills, CA) for insertion at  
342 the 89E11 landing site. Expression levels of FLAG-BiP transgenes were determined with  
343 western blotting. In brief, fly heads were homogenized in lysis buffer (10% SDS, 6M urea, and  
344 50mM Tris-HCl, pH 6.8+ 10% DTT), sonicated for 5 min, boiled for 2 min, and centrifuged for  
345 10 min at 10,000 g to remove debris. 10 $\mu$ L were separated by SDS-PAGE and transferred to  
346 nitrocellulose membranes. Blots were probed with anti-BiP (1:8000, gift from Dr. Don Ryoo,  
347 NYU, NY), anti-FLAG (1:2000 M2- F3165, Millipore Sigma, St. Louis, MO) and anti-Actin  
348 (1:4000, JLA-20, DSHB, Iowa City, IA) and detected using IRdye-labeled antibodies and an  
349 Odyssey scanner (LI-COR Biosciences, Lincoln, NE).

350

351 **Generation of GMR\_dsRNA<sup>white</sup> transgenes**

352 To make the eye-targeted dsRNA constructs against the *white* gene, the dsRNA sequence  
353 was obtained from a pAttb-UAS<sup>S.cer</sup>-dsRNA<sup>white</sup> vector (a gift from Dr. Dean Smith, UT  
354 Southwestern Medical Center, TX) and the UAS<sup>S.cer</sup>-Hsp40 promotor sequenced was replaced  
355 with a 5X-GMR promotor sequence, synthesized as a gBlock (IDT) and cloned with NEB HiFi  
356 Assembly Kit (NEB).

357



358 **Fly rearing conditions**

359 All flies were reared on standard molasses fly food, under room temperature conditions.  
360 For light treatments, flies were collected within one to two days of enclosing, and placed in 5cm  
361 diameter vials containing normal food, with no more than 25 flies, and placed at either LD (lights  
362 ON 8am/lights OFF 8pm) or LL. ERGs, head dissections and behavior assays were performed  
363 between 1pm and 4pm. The same intensity white LED light source was used for both conditions  
364 and flies were kept the same distance away from the light source, which amounted to  
365 approximately 500 lux. LD and LL treatments were done at 25°C. For the UPR and Fic<sup>E247G</sup>  
366 rough-eye interaction experiments, all flies were raised at 28°C.

367  
368 **Survival analysis of flies expressing genomic BiP construct**

369 *BiP*<sup>G0102</sup>/FM7c female virgin flies were crossed to males with either gen3xFLAG-BiP<sup>WT</sup>,  
370 gen3xFLAG-BiP<sup>T366A</sup> or gen3xFLAG-BiP<sup>T518A</sup>. The number of surviving non-FM7c male flies  
371 were scored by presence or lack of the Bar eye marker. Percent of expected was calculated from  
372 the actual number or recovered flies of the relevant genotypes compared the expected Mendelian  
373 number [# observed flies/ #expected flies]. Crosses were repeated three times (n=3). Total  
374 number of flies scored was at least 100 for each BiP variant.

375  
376 **Survival analysis of flies expressing BiP variants in a *Da-Gal4*, UAS-Fic<sup>E247G</sup> background**

377 C-terminally V5-His6-tagged UAS-Fic<sup>E247G</sup> (Casey et al., 2017) was expressed via the  
378 ubiquitous *Da-Gal4* driver in *fic*<sup>30C</sup>/CyO heterozygous flies. These flies were crossed to *w*; *fic*<sup>30C</sup>  
379 (controls), *w*; *fic*<sup>30C</sup>; gen3xFLAGBiP<sup>WT</sup>, *w*-; *fic*<sup>30C</sup>; gen3xFLAG<sup>T366A</sup>, *w*-; *fic*<sup>30C</sup>; gen3xFLAG-  
380 BiP<sup>T518A</sup>, or *BiP*<sup>G0102</sup>; *fic*<sup>30C</sup>; gen3xFLAG<sup>T366A</sup>. Offspring were scored and the number of adults

381 homozygous for *fic*<sup>30C</sup> with the *Da*-Gal4, UAS-*Fic*<sup>E247G</sup> allele and were compared to the number  
382 of *fic*<sup>30C</sup> heterozygous sibling controls. Percent of expected was calculated from the actual  
383 number or recovered flies of the relevant genotypes compared the expected Mendelian number  
384 [# observed flies/ #expected flies]. Crosses were repeated three times (n=3). Total number of  
385 flies scored was at least 100 for each BiP variant each repeat.

386

### 387 **Electroretinograms**

388 ERGs were recorded as previously described (Montell, 2012). Glass electrodes filled with  
389 2M NaCl were placed in the fly thorax and surface of the corneal lens (recording). A computer-  
390 controlled LED light source (MC1500; Schott, Mainz, Germany) was pulsed for 1s at 4s  
391 intervals. The resulting ERG traces were collected by an electrometer (IE-210; Warner  
392 Instruments, Hamden, CT), digitized with a Digidata 1440A and MiniDigi 1B system (Molecular  
393 Devices, San Jose, CA), and recorded using Clampex 10.2 (Molecular Devices) and quantified  
394 with Clampfit software (Molecular Devices). Flies were assayed in batches of eight to ten, and  
395 resulting quantifications are pooled from three independent biological repeats.

396

### 397 **Deep pseudopupil analysis**

398 Flies were anesthetized on CO<sub>2</sub> and aligned with one eye facing up. Using a stereoscopic  
399 dissection microscope, each fly was scored for presence or loss of the deep pseudopupil  
400 (Franceschini & Kirschfeld, 1971), and the percentage of flies with intact pseudopupils was  
401 calculated. For each genotype/treatment, over 50 flies were scored per replica and three  
402 biological replicas were performed (n=3).

403

404 **Light-startle behavior assay**

405 Assay was adapted from a previously described method (Ni et al., 2017). After 72 hours  
406 of LD or LL treatment, 16 flies per genotype were collected at the same time each morning and  
407 placed into individual Drosophila Assay Monitoring (DAM) chambers (TriKinetics Inc,  
408 Waltham, MA). The DAM monitors were placed into a dark incubator. Two hours later, a 500-  
409 lux light was turned on by a timer for five minutes. Data was collected with DAMSystem3.0 and  
410 DAMFileScan11.0 (TriKinetics Inc). The resulting data was exported to Microsoft Excel and  
411 graphed in GraphPad Prism. Three replica experiments were averaged and plotted as Time (min)  
412 vs Average activity per 2 min. bin (n=3). The change in response to light was calculated for each  
413 light pulse as [*mean beam breaks for 10min. post-pulse*] – [*mean beam breaks for 10min. pre-*  
414 *pulse*].

415

416 **Scanning electron microscopy**

417 SEMs of fly eyes were obtained as previously described (Wolff, 2011). Eyes were fixed  
418 in 2% paraformaldehyde, 2% glutaraldehyde, 0.2% Tween 20, and 0.1 M cacodylate buffer, pH  
419 7.4, for 2 hours. Samples were washed four times with increasing ethanol (25–100%) for 12  
420 hours each followed by a series of hexamethyldisilazane washes (25–100% in ethanol) for one  
421 hour each. Flies were air dried for 24 hours, mounted on SEM stubs, and the bodies were coated  
422 in fast-drying silver paint. Flies were sputter coated with a gold/pallidum mixture for 60s and  
423 imaged at 900X magnification, with extra high tension set at 3.0 kV on a scanning electron  
424 microscope (Sigma SEM; Carl Zeiss, Germany). Ten flies per genotype were mounted and three  
425 were imaged (n=3). Blinding of the samples' identity to the user acquiring the images was  
426 performed.

427

## 428 **Transmission electron microscopy**

429 TEMs of retina sections were performed as previously described (Jenny, 2011; Rahman  
430 et al., 2012). Briefly, 550 nm sections were cut and stained with toluidine blue to confirm  
431 orientation and section depth. Blocks were subsequently thin-sectioned at 70 nm with a diamond  
432 knife (Diatome, Hatfield, PA) on a Leica Ultracut 6 ultramicrotome (Leica Microsystems,  
433 Wetzlar, Germany) and collected onto formvar-coated, glow-discharged copper grids, post-  
434 stained with 2% aqueous uranyl acetate and lead citrate. Images were acquired on a Tecnai G2  
435 spirit transmission electron microscope (FEI) equipped with a LaB6 source using a voltage of  
436 120 kV. Blinding of the samples to the technicians performing the processing and the user  
437 acquiring the images was performed. Two fly heads per genotype/condition and at least three  
438 thin sections per sample were examined (n=2). Samples were unmasked after the images were  
439 processed.

440

## 441 **Immunohistochemistry for BiP and UPR reporters**

442 Fly heads were dissected in HL3 hemolymph-like solution, fixed for four hours in ice-  
443 cold 4% para-formaldehyde in filtered PBS, washed overnight in 25% (wt/vol) sucrose in  
444 phosphate buffer (pH 7.4), embedded in Optimal Cutting Temperature compound (EMS,  
445 Hatfield, PA) frozen in dry ice and sectioned at 20- $\mu$ m thickness on a cryostat microtome (CM  
446 1950, Leica Microsystems, Wetzlar, Germany). Sections were probed overnight with primary  
447 antibodies against *Drosophila* BiP (1:2000, Gift from Don Ryoo(Ryoo et al.), GFP (1:1000,  
448 A10262, ThermoFisher Scientific, Waltham, MA) or RFP (1:1000, 600-401-379, Rockland,  
449 Limerick, PA). Secondary antibodies were labeled with Alexa488-conjugated Goat anti-Chicken

450 (Molecular Probes, P/N# A-11039), Alexa488-conjugated Goat anti-Guinea Pig (Molecular  
451 Probes, P/N# A-11073), or Alexa568-conjugated Goat anti-Rabbit (Molecular Probes, P/N# A-  
452 11011). Alexa 647-conjugated phalloidin was also added to label Actin for identifying structures.  
453 Images were captured with an oil-immersion 63× NA-1.4 lens on an inverted confocal  
454 microscope (LSM710, Carl Zeiss). For each genotype and light rearing conditions,  
455 immunohistochemistry experiments were performed in two biological replicas with new sets of  
456 flies, using identical acquisition settings. Blinding of the samples to the user acquiring the  
457 images was performed when appropriate.

458

### 459 **Quantification of fluorescence staining**

460 Fluorescence images were quantified using ImageJ (NIH) adapting previous methods  
461 (Nandi et al., 2017). For each antibody, a threshold was determined, removing the lowest 10% of  
462 signal in LD control samples (to reduce variation from low level background signals). This same  
463 threshold was applied, and a mask was created for every image in a batch of staining. Within a 1-  
464  $\mu\text{m}$  optical slice, the retina and lamina regions were selected manually using an Actin stain and  
465 assigned as Regions of Interest. The integrated pixel intensity per unit area was measured within  
466 this selected area, redirecting to the threshold mask. In each fly, four sequential optical slices  
467 were quantified and averaged. For each genotype and treatment, four flies were quantified from  
468 two independent biological replicas for a total of eight flies. Data was normalized to the wild-  
469 type LD control for each replica. Outliers of greater than three standard deviations were omitted  
470 from the analysis.

471

472 **Yeast plasmids and strains**

473 Yeast genetic techniques were performed by standard procedures described previously.  
474 (Sherman et al., 1981). All strains were cultured in either rich (YPD: 1% yeast extract, 2%  
475 peptone, and 2% glucose) or complete synthetic minimal (CSM) media lacking appropriate  
476 amino acids with 2% glucose. Yeast were grown to log phase, serially diluted, and spotted onto  
477 agar plates to assay fitness and temperature sensitivity as previously described (Tran et al.,  
478 2007).

479 DNA fragments of *KAR2* was generated by PCR amplification of the endogenous *KAR2*  
480 gene using the primers 5'-GCATCCGCGGATACTCTCGTACCCTGCCGC-3' and 5'-  
481 ATGCGAGCTCCGTATATACTCAGTATAATC-3'. Plasmid p*KAR2*:LEU2 and p*KAR2*:URA3  
482 were generated by subcloning genomic DNA fragments containing promoter and coding  
483 sequence of *KAR2* into the *SacI* and *SacII* sites of pRS315 and pRS316, respectively.  
484 p*KAR2*T386A:LEU2 was generated by site directed mutagenesis of p*KAR2*:LEU2 using the  
485 primers 5'-  
486 GGTGGTGGTTCTGCTAGAATTCCAAAGGTCCAACAATTGTTAGAATCATACTTTGATGG-3' and  
487 5'-ACCTTTGGAATTCTAGCAGAACCACCAACCAAAACGATATCATCAACATCCTTCTTTTCC-3'.  
488 p*KAR2*T538A:LEU2 was generated by site directed mutagenesis of p*KAR2*:LEU2 using the  
489 primers 5'-AGATAAGGGAGCTGGTAAATCCGAATCTATCACCATCACTAACG-3' and 5'-  
490 GGATTTACCAGCTCCCTTATCTGTGGCAGACACCTTCAGAATACC-3'.

491 ACY008 yeast (mat A *kar2*::KAN *his3* $\Delta$ 0 *leu2* $\Delta$ 0 LYS *met15* $\Delta$ 0 *ura3* $\Delta$ 0 p*KAR2*:URA)  
492 were obtained by sporulation and dissection of *KAR2* heterozygous null yeast (Mata/mat@  
493 *KAR2*::KAN/*KAR2* *his3* $\Delta$ 0/*his3* $\Delta$ 0 *leu2* $\Delta$ 0/*leu2* $\Delta$ 0 LYS/lys MET/*met15* $\Delta$ 0 *ura3* $\Delta$ 0/*ura3* $\Delta$ 0)  
494 (GE) transformed with p*KAR2*:URA. Standard plasmid shuffle techniques with 5-FOA(Zymo)

495 were utilized to obtain ACY016 (mat A kar2::KAN his3 $\Delta$ 0 leu2 $\Delta$ 0 LYS met15 $\Delta$ 0 ura3 $\Delta$ 0  
496 pKAR2:LEU2) ACY017(mat A kar2::KAN his3 $\Delta$ 0 leu2 $\Delta$ 0 LYS met15 $\Delta$ 0 ura3 $\Delta$ 0  
497 pKAR2T386A:LEU2), and ACY020(mat A kar2::KAN his3 $\Delta$ 0 leu2 $\Delta$ 0 LYS met15 $\Delta$ 0 ura3 $\Delta$ 0  
498 pKAR2T538A:LEU2)

499

## 500 **Statistics**

501 Statistics were performed using GraphPad Prism 7. Normality of data distribution was  
502 determined using D'Agostino's & Pearson's normality test. For the genetic analysis in Figure 1  
503 and the ERG measurements in Supplemental Figures 2,3,5, and 6, significance was determined  
504 using one-way ANOVA, followed by Tukey's multiple comparisons tests. Statistical significance  
505 for non-parametric data, including the ERGs with light treatment quantifications in Figure 2, was  
506 determined by Kruskal-Wallis tests followed by multiple comparisons testing with Dunn's  
507 correction. For the image quantification data in Figure 4, significance was determined by two-  
508 way ANOVA followed by multiple comparisons with Benjamini-Krieger-Yekutieli's False  
509 Discovery Rate correction. All tests were two-sided with no experimental matching. RStudio  
510 (version 1.1.442, 2018, RStudio, Inc.) was used for Fisher's Exact Tests for the eye interaction  
511 screen, with Bonferroni's multiple comparison method to determine significance. Standard R  
512 functions were used, no custom scripts were developed. Tests were two-sided. When possible,  
513 blinding of sample identities was performed for image acquisition and fluorescence intensity  
514 quantification. Sample sizes for ERG assays, EM experiments, fluorescence quantifications and  
515 fly genetic analysis were determined based from previous experience (Nandi et al., 2017;  
516 Rahman et al., 2012; Stenesen et al., 2015).

517 **Competing Interests:**

518 The authors declare no competing interests.

519



520

## References:

- 521 Akbar, M. A., Ray, S., & Krämer, H. (2009). The SM protein Car/Vps33A regulates SNARE-  
522 mediated trafficking to lysosomes and lysosome-related organelles. *Mol Biol Cell*, *20*(6),  
523 1705-1714. doi:10.1091/mbc.E08-03-0282
- 524 Amin-Wetzel, N., Saunders, R. A., Kamphuis, M. J., Rato, C., Preissler, S., Harding, H. P., &  
525 Ron, D. (2017). A J-Protein Co-chaperone Recruits BiP to Monomerize IRE1 and  
526 Repress the Unfolded Protein Response. *Cell*, *171*(7), 1625-1637 e1613.  
527 doi:10.1016/j.cell.2017.10.040
- 528 Bertolotti, A., Zhang, Y., Hendershot, L. M., Harding, H. P., & Ron, D. (2000). Dynamic  
529 interaction of BiP and ER stress transducers in the unfolded-protein response. *Nat Cell*  
530 *Biol*, *2*(6), 326-332. doi:10.1038/35014014
- 531 Borycz, J., Borycz, J. A., Loubani, M., & Meinertzhagen, I. A. (2002). tan and ebony genes  
532 regulate a novel pathway for transmitter metabolism at fly photoreceptor terminals. *J*  
533 *Neurosci*, *22*(24), 10549-10557.
- 534 Brown, M. S., Segal, A., & Stadtman, E. R. (1971). Modulation of glutamine synthetase  
535 adenylation and deadenylation is mediated by metabolic transformation of the P II -  
536 regulatory protein. *Proc Natl Acad Sci U S A*, *68*(12), 2949-2953.
- 537 Carrara, M., Prischi, F., Nowak, P. R., Kopp, M. C., & Ali, M. M. (2015). Noncanonical binding  
538 of BiP ATPase domain to Ire1 and Perk is dissociated by unfolded protein CH1 to initiate  
539 ER stress signaling. *Elife*, *4*. doi:10.7554/eLife.03522
- 540 Casey, A. K., Moehlman, A. T., Zhang, J., Servage, K. A., Krämer, H., & Orth, K. (2017). Fic-  
541 mediated deAMPylation is not dependent on homodimerization and rescues toxic  
542 AMPylation in flies. *J Biol Chem*, *292*(51), 21193-21204. doi:10.1074/jbc.M117.799296
- 543 Casey, A. K., & Orth, K. (2018). Enzymes Involved in AMPylation and deAMPylation. *Chem*  
544 *Rev*, *118*(3), 1199-1215. doi:10.1021/acs.chemrev.7b00145
- 545 Colley, N. J., Cassill, J. A., Baker, E. K., & Zuker, C. S. (1995). Defective intracellular transport  
546 is the molecular basis of rhodopsin-dependent dominant retinal degeneration. *Proc Natl*  
547 *Acad Sci U S A*, *92*(7).
- 548 Damulewicz, M., Mazzotta, G. M., Sartori, E., Rosato, E., Costa, R., & Pyza, E. M. (2017).  
549 Cryptochrome Is a Regulator of Synaptic Plasticity in the Visual System of *Drosophila*  
550 *melanogaster*. *Front Mol Neurosci*, *10*, 165. doi:10.3389/fnmol.2017.00165
- 551 Dietzl, G., Chen, D., Schnorrer, F., Su, K. C., Barinova, Y., Fellner, M., . . . Dickson, B. J.  
552 (2007). A genome-wide transgenic RNAi library for conditional gene inactivation in  
553 *Drosophila*. *Nature*, *448*(7150), 151-156. doi:10.1038/nature05954
- 554 Dolph, P. J., Ranganathan, R., Colley, N. J., Hardy, R. W., Socolich, M., & Zuker, C. S. (1993).  
555 Arrestin function in inactivation of G protein-coupled receptor rhodopsin in vivo.  
556 *Science*, *260*(5116), 1910-1916.
- 557 Franceschini, N., & Kirschfeld, K. (1971). [Pseudopupil phenomena in the compound eye of  
558 *drosophila*]. *Kybernetik*, *9*(5), 159-182.
- 559 Gardner, B. M., Pincus, D., Gotthardt, K., Gallagher, C. M., & Walter, P. (2013). Endoplasmic  
560 reticulum stress sensing in the unfolded protein response. *Cold Spring Harb Perspect*  
561 *Biol*, *5*(3), a013169. doi:10.1101/cshperspect.a013169
- 562 Gaut, J. R., & Hendershot, L. M. (1993). Mutations within the nucleotide binding site of  
563 immunoglobulin-binding protein inhibit ATPase activity and interfere with release of  
564 immunoglobulin heavy chain. *J Biol Chem*, *268*(10), 7248-7255.

- 565 Ham, H., Woolery, A. R., Tracy, C., Stenesen, D., Krämer, H., & Orth, K. (2014). Unfolded  
566 protein response-regulated Drosophila Fic (dFic) protein reversibly AMPylates BiP  
567 chaperone during endoplasmic reticulum homeostasis. *J Biol Chem*, *289*(52), 36059-  
568 36069. doi:10.1074/jbc.M114.612515
- 569 Harms, A., Stanger, F. V., & Dehio, C. (2016). Biological Diversity and Molecular Plasticity of  
570 FIC Domain Proteins. *Annu Rev Microbiol*, *70*, 341-360. doi:10.1146/annurev-micro-  
571 102215-095245
- 572 Hendershot, L. M., Ting, J., & Lee, A. S. (1988). Identity of the immunoglobulin heavy-chain-  
573 binding protein with the 78,000-dalton glucose-regulated protein and the role of  
574 posttranslational modifications in its binding function. *Mol Cell Biol*, *8*(10), 4250-4256.
- 575 Jenny, A. (2011). Preparation of adult Drosophila eyes for thin sectioning and microscopic  
576 analysis. *J Vis Exp*(54). doi:10.3791/2959
- 577 Johnson, K., Grawe, F., Grzeschik, N., & Knust, E. (2002). Drosophila crumbs is required to  
578 inhibit light-induced photoreceptor degeneration. *Curr Biol*, *12*(19), 1675-1680.
- 579 Kang, K., Ryoo, H. D., Park, J. E., Yoon, J. H., & Kang, M. J. (2015). A Drosophila Reporter for  
580 the Translational Activation of ATF4 Marks Stressed Cells during Development. *PLoS*  
581 *One*, *10*(5), e0126795. doi:10.1371/journal.pone.0126795
- 582 Kingdon, H. S., Shapiro, B. M., & Stadtman, E. R. (1967). Regulation of glutamine synthetase.  
583 8. ATP: glutamine synthetase adenylyltransferase, an enzyme that catalyzes alterations in  
584 the regulatory properties of glutamine synthetase. *Proc Natl Acad Sci U S A*, *58*(4), 1703-  
585 1710.
- 586 Kiselev, A., Socolich, M., Vinos, J., Hardy, R. W., Zuker, C. S., & Ranganathan, R. (2000). A  
587 molecular pathway for light-dependent photoreceptor apoptosis in Drosophila. *Neuron*,  
588 *28*(1), 139-152.
- 589 Kozutsumi, Y., Segal, M., Normington, K., Gething, M. J., & Sambrook, J. (1988). The presence  
590 of malfolded proteins in the endoplasmic reticulum signals the induction of glucose-  
591 regulated proteins. *Nature*, *332*(6163), 462-464. doi:10.1038/332462a0
- 592 Lee, S. J., & Montell, C. (2004). Suppression of constant-light-induced blindness but not retinal  
593 degeneration by inhibition of the rhodopsin degradation pathway. *Curr Biol*, *14*(23),  
594 2076-2085. doi:10.1016/j.cub.2004.11.054
- 595 Lee, S. J., Xu, H., Kang, L. W., Amzel, L. M., & Montell, C. (2003). Light adaptation through  
596 phosphoinositide-regulated translocation of Drosophila visual arrestin. *Neuron*, *39*(1),  
597 121-132.
- 598 Leonard, D. S., Bowman, V. D., Ready, D. F., & Pak, W. L. (1992). Degeneration of  
599 photoreceptors in rhodopsin mutants of Drosophila. *J Neurobiol*, *23*(6), 605-626.  
600 doi:10.1002/neu.480230602
- 601 Ma, Y., & Hendershot, L. M. (2003). Delineation of a negative feedback regulatory loop that  
602 controls protein translation during endoplasmic reticulum stress. *J Biol Chem*, *278*(37),  
603 34864-34873. doi:10.1074/jbc.M301107200
- 604 Meunier, L., Usherwood, Y. K., Chung, K. T., & Hendershot, L. M. (2002). A subset of  
605 chaperones and folding enzymes form multiprotein complexes in endoplasmic reticulum  
606 to bind nascent proteins. *Mol Biol Cell*, *13*(12), 4456-4469. doi:10.1091/mbc.E02-05-  
607 0311
- 608 Montell, C. (2012). Drosophila visual transduction. *Trends Neurosci*, *35*(6), 356-363.  
609 doi:10.1016/j.tins.2012.03.004

- 610 Nandi, N., Tyra, L. K., Stenesen, D., & Krämer, H. (2017). Stress-induced Cdk5 activity  
611 enhances cytoprotective basal autophagy in *Drosophila melanogaster* by phosphorylating  
612 acinus at serine(437). *Elife*, 6. doi:10.7554/eLife.30760
- 613 Ni, J. D., Baik, L. S., Holmes, T. C., & Montell, C. (2017). A rhodopsin in the brain functions in  
614 circadian photoentrainment in *Drosophila*. *Nature*, 545(7654), 340-344.  
615 doi:10.1038/nature22325
- 616 Preissler, S., Rato, C., Chen, R., Antrobus, R., Ding, S., Fearnley, I. M., & Ron, D. (2015).  
617 AMPylation matches BiP activity to client protein load in the endoplasmic reticulum.  
618 *Elife*, 4, e12621. doi:10.7554/eLife.12621
- 619 Preissler, S., Rato, C., Perera, L., Saudek, V., & Ron, D. (2017). FICD acts bifunctionally to  
620 AMPylate and de-AMPylylate the endoplasmic reticulum chaperone BiP. *Nat Struct Mol*  
621 *Biol*, 24(1), 23-29. doi:10.1038/nsmb.3337
- 622 Preissler, S., Rohland, L., Yan, Y., Chen, R., Read, R. J., & Ron, D. (2017). AMPylation targets  
623 the rate-limiting step of BiP's ATPase cycle for its functional inactivation. *Elife*, 6.  
624 doi:10.7554/eLife.29428
- 625 Rahman, M., Ham, H., Liu, X., Sugiura, Y., Orth, K., & Kramer, H. (2012). Visual  
626 neurotransmission in *Drosophila* requires expression of Fic in glial capitate projections.  
627 *Nat Neurosci*, 15(6), 871-875. doi:10.1038/nn.3102
- 628 Rosenbaum, E. E., Hardie, R. C., & Colley, N. J. (2006). Calnexin is essential for rhodopsin  
629 maturation, Ca<sup>2+</sup> regulation, and photoreceptor cell survival. *Neuron*, 49(2), 229-241.  
630 doi:10.1016/j.neuron.2005.12.011
- 631 Ryoo, H. D., Domingos, P. M., Kang, M. J., & Steller, H. (2007). Unfolded protein response in a  
632 *Drosophila* model for retinal degeneration. *EMBO J*, 26(1), 242-252.  
633 doi:10.1038/sj.emboj.7601477
- 634 Scott, K., Becker, A., Sun, Y., Hardy, R., & Zuker, C. (1995). Gq alpha protein function in vivo:  
635 genetic dissection of its role in photoreceptor cell physiology. *Neuron*, 15(4), 919-927.
- 636 Shen, J., Snapp, E. L., Lippincott-Schwartz, J., & Prywes, R. (2005). Stable binding of ATF6 to  
637 BiP in the endoplasmic reticulum stress response. *Mol Cell Biol*, 25(3), 921-932.  
638 doi:10.1128/MCB.25.3.921-932.2005
- 639 Sherman, F., Fink, G. R., Hicks, J. B., & Laboratory, C. S. H. (1981). *Methods in yeast genetics*:  
640 Cold Spring Harbor Laboratory.
- 641 Smith, D. P., Ranganathan, R., Hardy, R. W., Marx, J., Tsuchida, T., & Zuker, C. S. (1991).  
642 Photoreceptor deactivation and retinal degeneration mediated by a photoreceptor-specific  
643 protein kinase C. *Science*, 254(5037), 1478-1484.
- 644 Sone, M., Zeng, X., Larese, J., & Ryoo, H. D. (2013). A modified UPR stress sensing system  
645 reveals a novel tissue distribution of IRE1/XBP1 activity during normal *Drosophila*  
646 development. *Cell Stress Chaperones*, 18(3), 307-319. doi:10.1007/s12192-012-0383-x
- 647 Soukup, S. F., Pocha, S. M., Yuan, M., & Knust, E. (2013). DLin-7 is required in postsynaptic  
648 lamina neurons to prevent light-induced photoreceptor degeneration in *Drosophila*. *Curr*  
649 *Biol*, 23(14), 1349-1354. doi:10.1016/j.cub.2013.05.060
- 650 Stenesen, D., Moehlman, A. T., & Krämer, H. (2015). The carcinine transporter CarT is required  
651 in *Drosophila* photoreceptor neurons to sustain histamine recycling. *Elife*, 4, e10972.  
652 doi:10.7554/eLife.10972
- 653 Sugie, A., Hakeda-Suzuki, S., Suzuki, E., Silies, M., Shimosono, M., Mohl, C., . . . Tavosanis,  
654 G. (2015). Molecular Remodeling of the Presynaptic Active Zone of *Drosophila*

- 655 Photoreceptors via Activity-Dependent Feedback. *Neuron*, 86(3), 711-725.  
656 doi:10.1016/j.neuron.2015.03.046
- 657 Tran, E. J., Zhou, Y., Corbett, A. H., & Wenthe, S. R. (2007). The DEAD-box protein Dbp5  
658 controls mRNA export by triggering specific RNA:protein remodeling events. *Mol Cell*,  
659 28(5), 850-859. doi:10.1016/j.molcel.2007.09.019
- 660 Truttmann, M. C., Cruz, V. E., Guo, X., Engert, C., Schwartz, T. U., & Ploegh, H. L. (2016). The  
661 *Caenorhabditis elegans* Protein FIC-1 Is an AMPylase That Covalently Modifies Heat-  
662 Shock 70 Family Proteins, Translation Elongation Factors and Histones. *PLoS Genet*,  
663 12(5), e1006023. doi:10.1371/journal.pgen.1006023
- 664 Truttmann, M. C., Zheng, X., Hanke, L., Damon, J. R., Grootveld, M., Krakowiak, J., . . .  
665 Ploegh, H. L. (2017). Unrestrained AMPylation targets cytosolic chaperones and  
666 activates the heat shock response. *Proc Natl Acad Sci U S A*, 114(2), E152-E160.  
667 doi:10.1073/pnas.1619234114
- 668 Venken, K. J., He, Y., Hoskins, R. A., & Bellen, H. J. (2006). P[acman]: a BAC transgenic  
669 platform for targeted insertion of large DNA fragments in *D. melanogaster*. *Science*,  
670 314(5806), 1747-1751. doi:10.1126/science.1134426
- 671 Wieteska, L., Shahidi, S., & Zhuravleva, A. (2017). Allosteric fine-tuning of the conformational  
672 equilibrium poises the chaperone BiP for post-translational regulation. *Elife*, 6.  
673 doi:10.7554/eLife.29430
- 674 Wolff, T. (2011). Preparation of *Drosophila* eye specimens for scanning electron microscopy.  
675 *Cold Spring Harb Protoc*, 2011(11), 1383-1385. doi:10.1101/pdb.prot066506
- 676 Woolery, A. R., Yu, X., LaBaer, J., & Orth, K. (2014). AMPylation of Rho GTPases subverts  
677 multiple host signaling processes. *J Biol Chem*, 289(47), 32977-32988.  
678 doi:10.1074/jbc.M114.601310  
679

680

681

682

### 683 **Acknowledgments:**

684 We thank Drs. Eric Olson and Joe Takahashi and the members of the Kramer and Orth labs for  
685 discussion and technical assistance. We thank the Bloomington Stock Center (NIH  
686 P40OD018537) and the Vienna *Drosophila* Resource Center (VDRC, [www.vdrc.at](http://www.vdrc.at)) for flies and  
687 the Molecular and Cellular Imaging Facility at the University of Texas Southwestern Medical  
688 center for help with electron microscopy (NIH S10 OD020103-01).

689

690 **Funding:** K.O. is a Burroughs Wellcome Investigator in Pathogenesis of Infectious Disease, a  
691 Beckman Young Investigator, and a W. W. Caruth, Jr., Biomedical Scholar and has an Earl A.  
692 Forsythe Chair in Biomedical Science.

693

694 **Author contributions:**

695 A.T.M, A.C. K.O and H.K. conceived, designed, and analyzed experiments and wrote the  
696 manuscript. All experiments except yeast experiments were performed by A.T.M. A.C. and K.S.  
697 performed mass spec experiments.

698

699 **Data and materials availability:** Fly stocks are available upon request. All data are contained  
700 in the source files.

701

702 **Correspondence to:** [Helmut.Kramer@UTSouthwestern.edu](mailto:Helmut.Kramer@UTSouthwestern.edu) and

703 [Kim.Orth@utsouthwestern.edu](mailto:Kim.Orth@utsouthwestern.edu).

704

705

## Figures

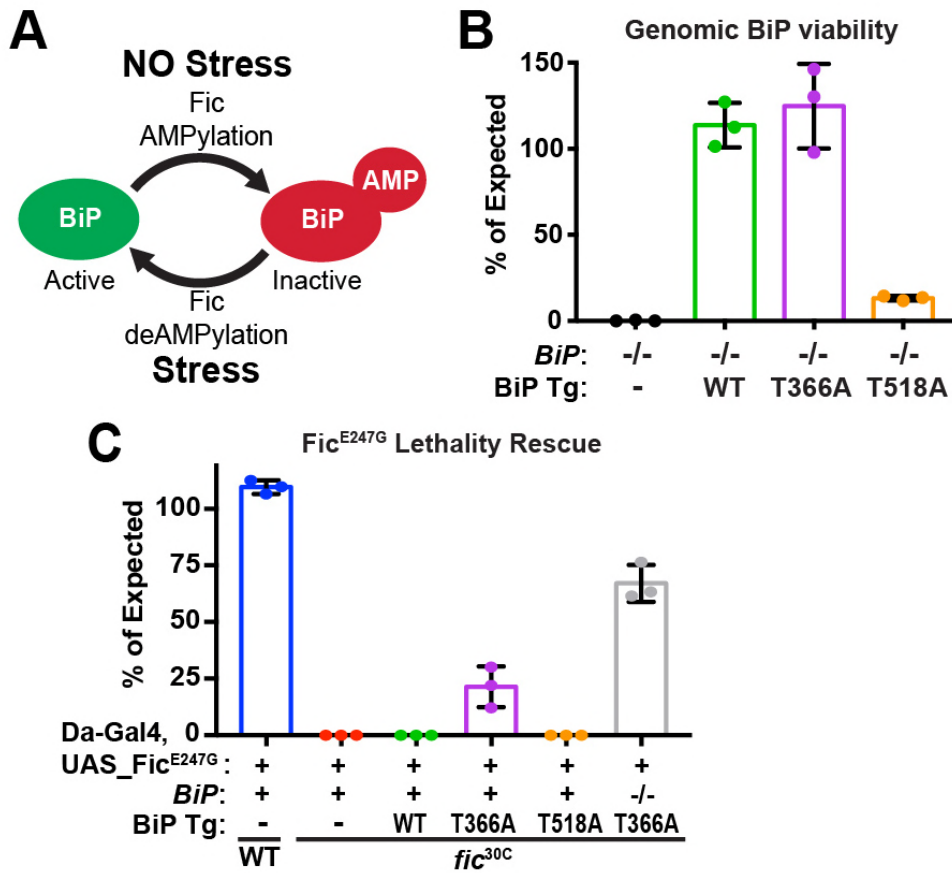

706

707 **Figure 1. BiP is a target of Fic AMPylation and deAMPylation *in vivo*.** (A) BiP AMPylation  
 708 during times of low ER stress reserves a portion of the chaperone to allow for a rapid,  
 709 deAMPylation-driven, response to high ER stress (Casey et al., 2017; Preissler, Rato, et al.,  
 710 2017). (B) Bar graphs show the percentage of null mutant *BiP<sup>G0102/y</sup>* males rescued by the  
 711 indicated genomic BiP<sup>WT</sup>, BiP<sup>T366A</sup> or BiP<sup>T518A</sup> genomic transgene (Tg) relative to sibling  
 712 controls. N=3 biological replicas. At least 50 flies scored for each replica. Bar graphs show  
 713 means +/- Standard Deviation (SD). (C) Bar graphs show the percentage of viable flies of the  
 714 indicated wild type or *fic<sup>30C</sup>* genotypes expressing the overactive Fic<sup>E247G</sup> under the ubiquitous  
 715 Da-Gal4 driver relative to sibling controls. Among the indicated genomic BiP transgenes, only  
 716 BiP<sup>T366A</sup> provides partial rescue of lethality in the *BiP<sup>+/+</sup>* background and near complete rescue in  
 717 a *BiP<sup>G0102</sup>* null background. N=3 biological replicas. At least 100 total flies scored for each  
 718 replica. Bar graphs show means +/- SD.



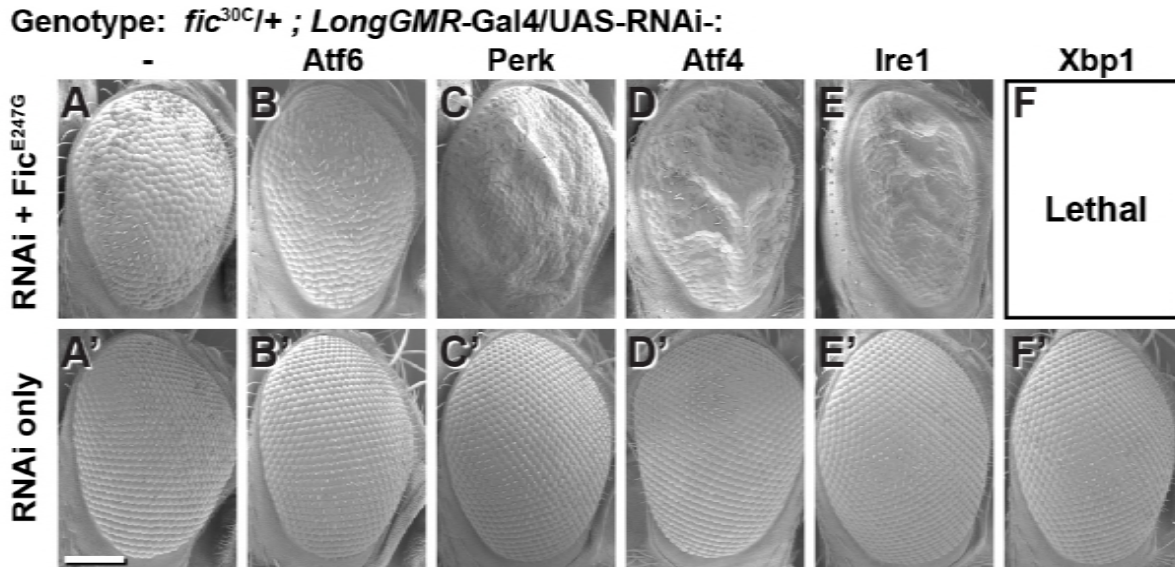

719

720

721

722

723

**Figure 2. Genetic interactions between Fic and UPR genes.** Representative SEM images of heterozygote mutant *fic*<sup>30C/+</sup> eyes expressing the indicated UAS-RNAi transgenes with (A-F) or without (A'-F') UAS-*Fic*<sup>E247G</sup> under *longGMR-Gal4* control. See Supplemental Table 1 for quantification. Scale bar: 100 $\mu$ M.

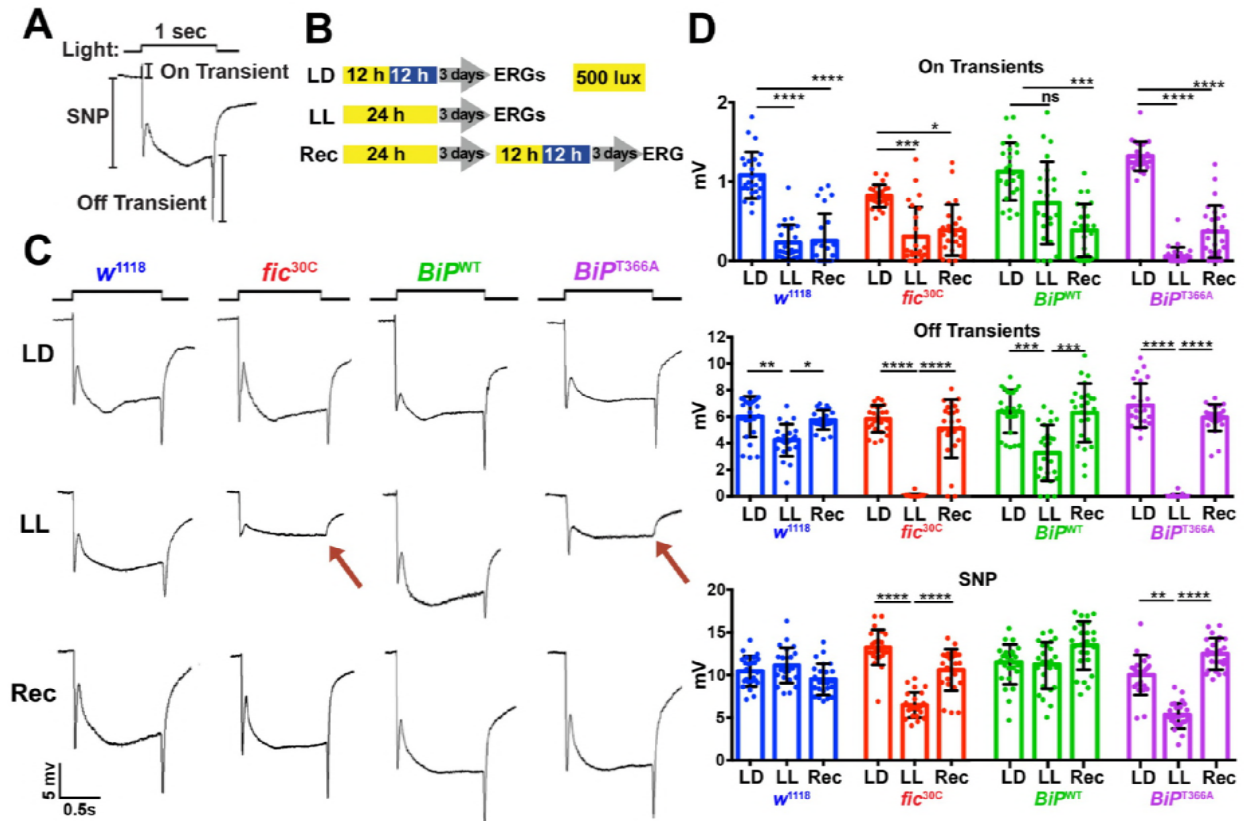

724

725

**Figure 3. Fic-mediated AMPylation of BiP is required for photoreceptor maintenance. (A)**

726

A representative ERG trace in response to a 1-sec light pulse displaying the sustained negative

727

potential (SNP), representing the depolarization within photoreceptor neurons, and the ON &

728

OFF transients, reflecting post-synaptic activity of lamina neurons. **(B)** Representation of the

729

different light treatments of flies before ERG recordings: 3 days of 12hr light (500 lux) and 12hr

730

dark (LD), 3 days of continuous light (LL) or 3 days of continuous light followed by 3 days of

731

LD (Rec). 1-sec light pulses were performed at 4 sec intervals. **(C)** Representative traces from

732

*w<sup>1118</sup>*, *fic<sup>30C</sup>*, *BiP<sup>WT</sup>* and *BiP<sup>T366A</sup>* flies. Under LL, *fic<sup>30C</sup>* and *BiP<sup>T366A</sup>* mutants lose ON and OFF

733

transients (red arrows) and have reduced SNPs. The changes are reversed after 3-days of

734

recovery (Rec). **(D)** Quantification of key components of ERGs shown in panel C. Bar graphs

735

show means +/- SD. \*\*\*\*,  $p < 0.0001$ ; \*\*\*,  $p < 0.001$ ; \*\*,  $p < 0.01$ ; \*,  $p < 0.05$ ;  $n = 24$  flies for

736

each genotype/condition, pooled from three independent biological replicas.



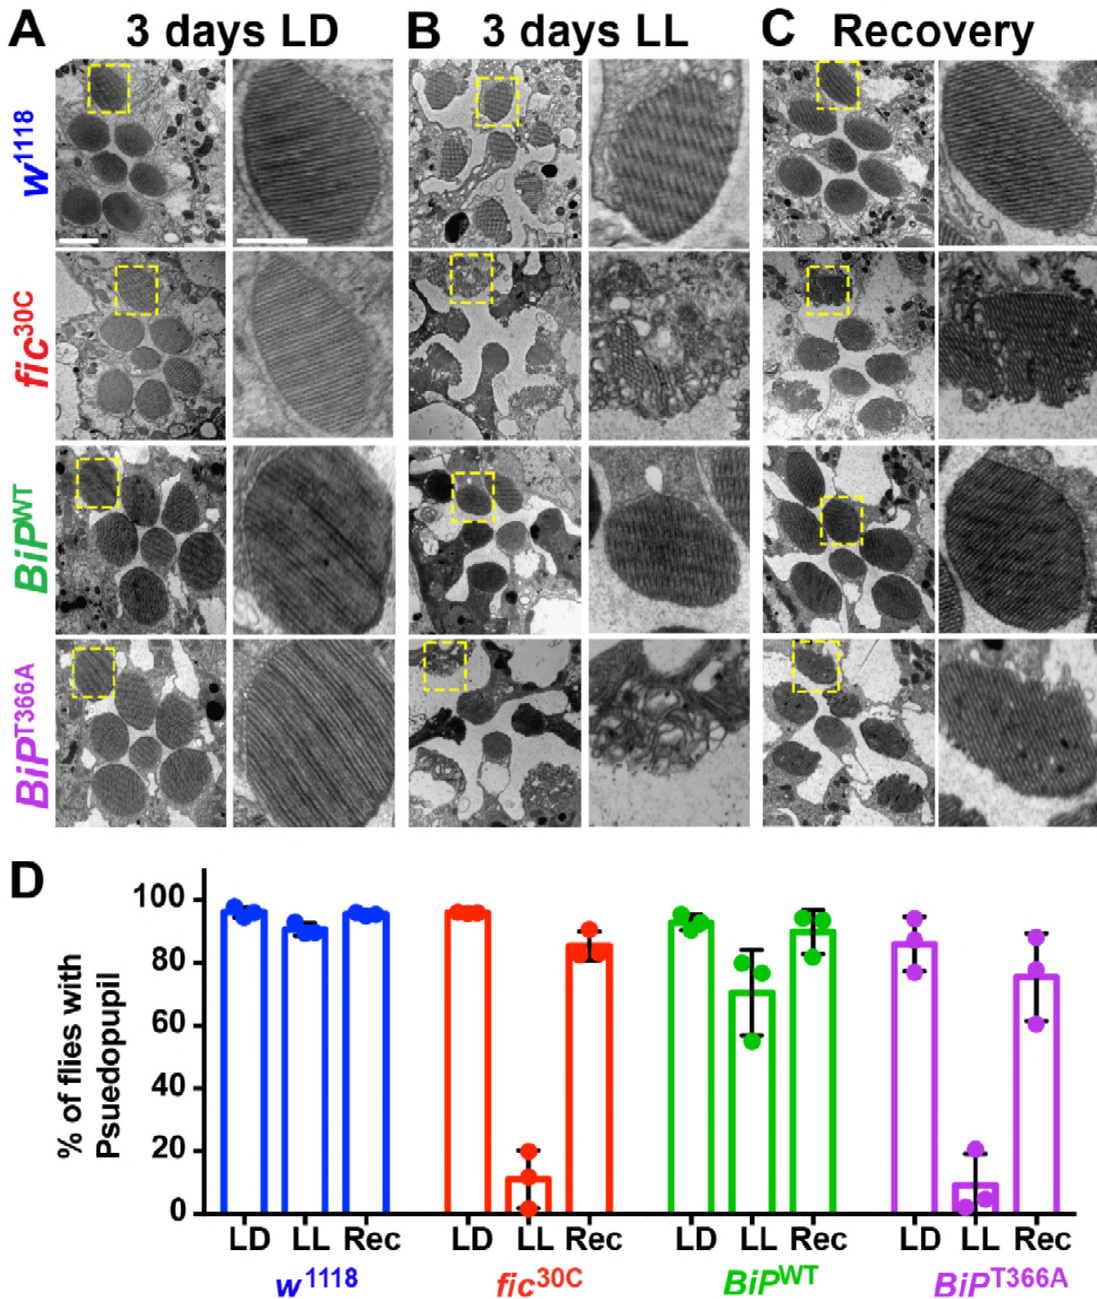

737

738 **Figure 4. AMPylation of BiP is required for maintaining structural plasticity in the retina.**

739 (A-C) Representative TEM images of retina thin sections from the indicated genotypes with  
740 either standard LD (A), the stress-inducing LL (B) or recovery treatment (C). Scale bars: 1 μM.

741 Yellow boxes indicate rhabdomeres shown in high magnification images. High magnification

742 scale bars: 0.5 μM. (D) Percentages of flies with intact deep pseudopupil following LD, LL and

743 Rec. N=3 independent biological replicas with approximately 50 flies scored per genotype per

744 replica. Bar graphs show means +/- SD.

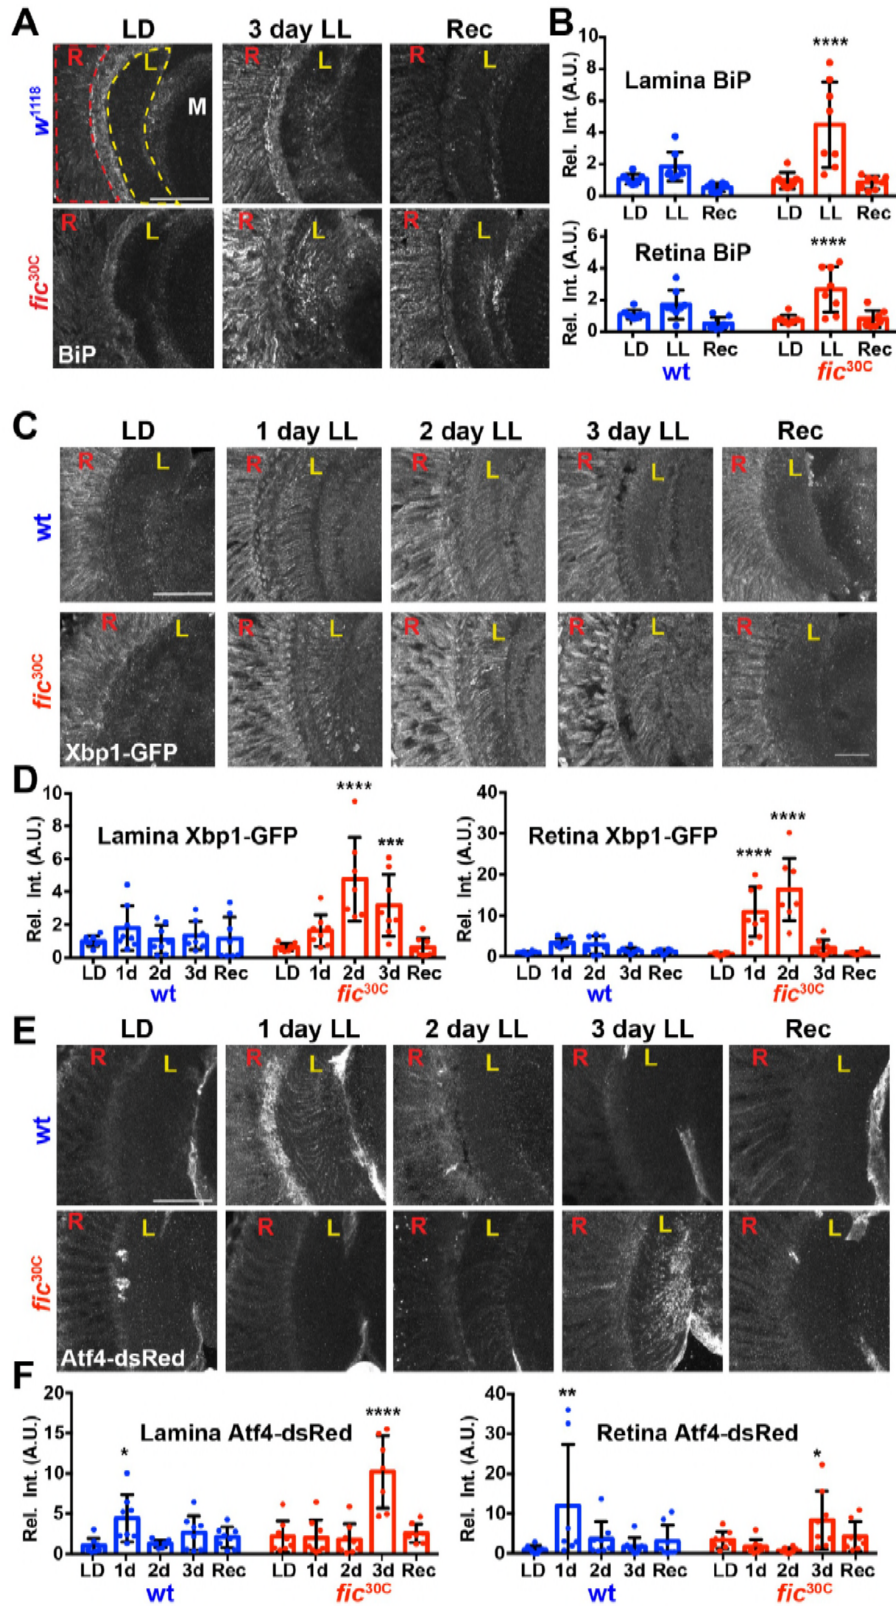

745

746

747

**Figure 5. BiP AMPylation regulates ER homeostasis during prolonged light stimulation.**

**(A)** Representative images of BiP immunohistochemistry in sections of  $w^{1118}$  and  $fic^{30C}$  flies

748 following 3 days LD, LL or Recovery treatments. **(B)** Quantification of BiP fluorescence  
749 intensity, normalized to wild-type LD controls, in the lamina neuropil and retina from 2  
750 independent experiments. **(C)** Representative images of a Xbp1-GFP splicing reporter in either a  
751 *Fic* wild-type or the null *fic*<sup>30C</sup> background following LD, 1-day LL, 2-day LL, 3-day LL, and  
752 Recovery conditions. **(D)** Quantification of GFP fluorescence intensity, normalized to wild-type  
753 LD controls, in the lamina neuropil and retina from 2 independent experiments. **(E)**  
754 Representative images of an *Atf4*-dsRed reporter in either a wild-type or *fic*<sup>30C</sup> background  
755 following LD, 1-day LL, 2-day LL, 3-day LL, and Recovery conditions. **(F)** Quantification of  
756 *Atf4*-dsRed intensity, normalized to wild-type LD controls, in the lamina neuropil and retina  
757 from 2 independent experiments. For all experiments, n= 8 flies per genotype/condition, with  
758 exceptions of outliers falling 3 standard deviations outside the mean. Bar graphs show means +/-  
759 SD. For all experiments, significance is indicated for treatment compared to the LD condition for  
760 the corresponding genotype. \*\*\*\*\*, p < 0.0001; \*\*\*, p < 0.001; \*\*, p < 0.01; \*, p < 0.05. All scale  
761 bars: 50  $\mu$ M.

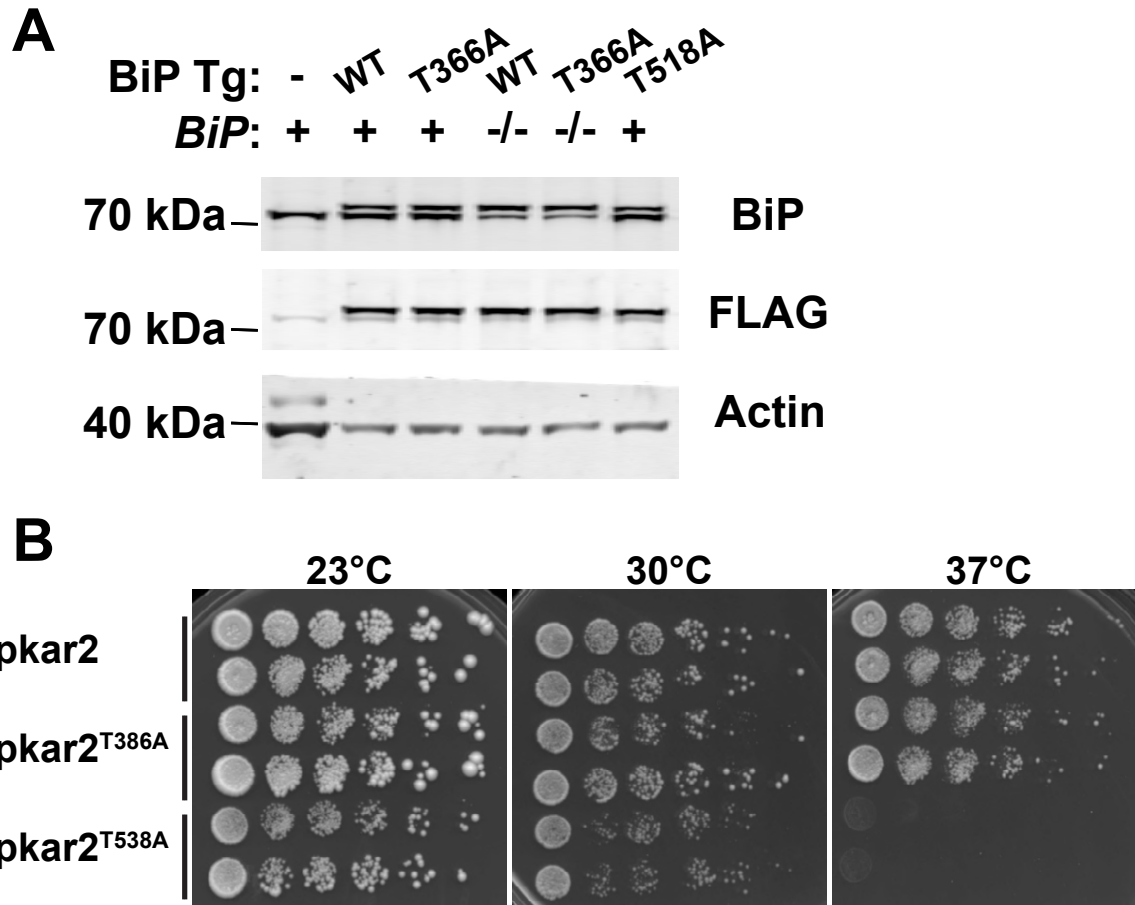

762

763

**Figure 1- figure supplement 1. Expression of genomic BiP transgenes**

764

(A) Western blots for FLAG-tagged BiP transgenes and total BiP in whole head lysates in *BiP* wild type or homozygous mutant background as indicated. Actin (JLA-20) served as a loading control.

765

766

(B) *Kar2*<sup>T538A</sup> mutants have temperature-sensitive growth defects. Yeast strains *kar2*Δ +*pKar2*, *kar2*Δ +*pkar2*<sup>T386A</sup>, and *kar2*Δ +*pkar2*<sup>T538A</sup> were grown at 25°C and five-fold serially

767

768

diluted onto plates of rich media incubated at the indicated temperatures.



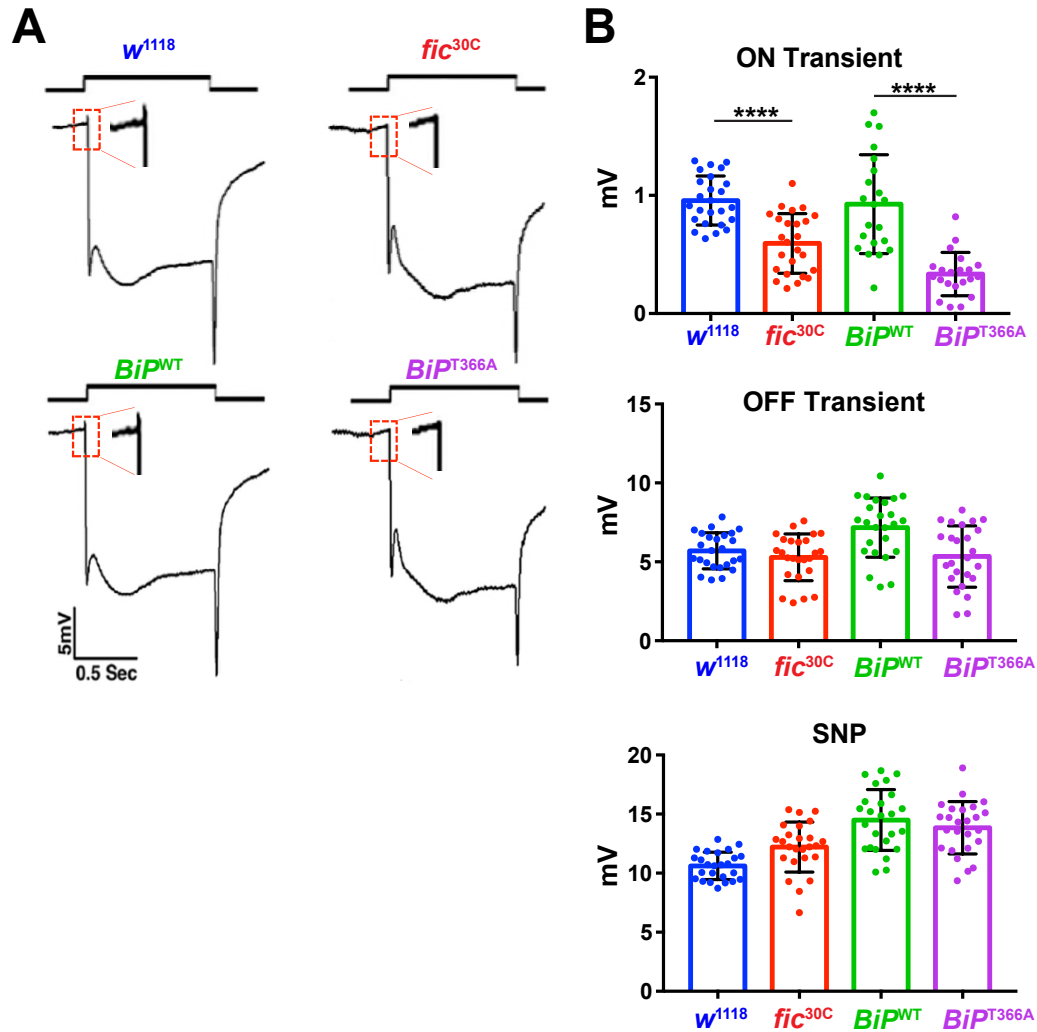

769

770

**Figure 1- figure supplement 2. AMPylation-resistant *BiP<sup>T366A</sup>* phenocopies *fic*.**

771

(A) ERGs of *fic<sup>30C</sup>* flies show reduced ON transients (arrows). Flies homozygous for a lethal

772

*BiP<sup>G0102</sup>* allele rescued by *BiP<sup>WT</sup>* transgene have normal vision but flies rescued with the mutant

773

*BiP<sup>T366A</sup>* transgene display reduced ON transients. (B) Quantification of ERG traces. Bar graphs

774

show means +/- SD. \*\*\*\*,  $p < 0.0001$ ; \*\*\*,  $p < 0.001$ ; \*,  $p < 0.05$ ;  $n = 24$  flies per genotype and

775

condition.

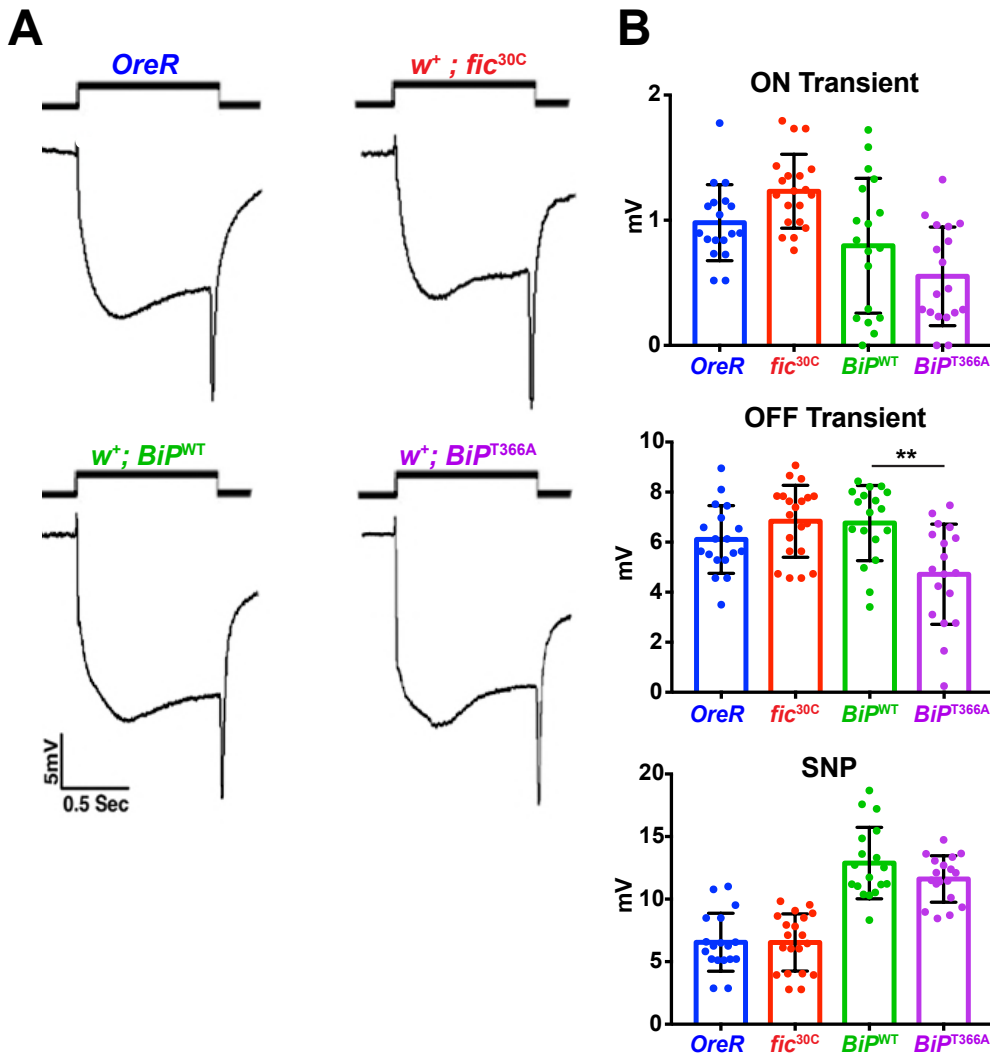

776

777 **Figure 1- figure supplement 3. Red eye pigment suppresses ERG phenotypes of *fic<sup>30C</sup>* and**  
778 ***BiP<sup>T366A</sup>* mutants.**

779 **(A)** ERGs of *OreR* and red-eyed *fic<sup>30C</sup>* flies as well as *BiP<sup>WT</sup>* and *BiP<sup>T366A</sup>* animals. **(B)**  
780 Quantification of ERG data. Bar graphs show means +/- SD. \*\*,  $p < 0.01$ ,  $n = 18$  flies per  
781 genotype and condition.

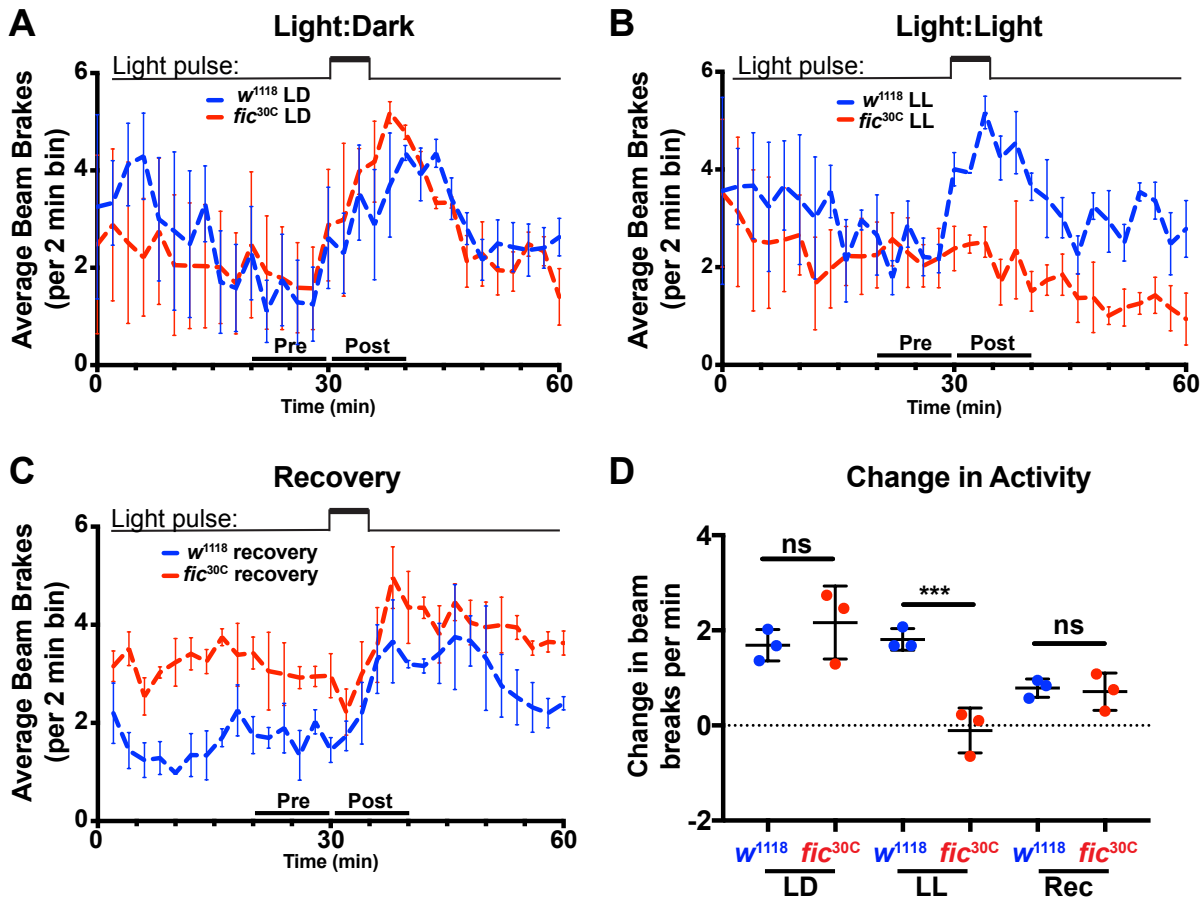

782

783

784

**Figure 3- figure supplement 1. Light-induced defects in light-startle activity in  $fic^{30C}$  mutants.**

785

(A, B, & C) Actogram of  $w^{1118}$  or  $fic^{30C}$  flies reared in LD for three days (A), LL for three days

786

(B), or recovery condition (three days in LL then three days in LD) (C). Light pulse is indicated

787

by upper bars. Data is averaged from three biological replicas, each containing 16 flies per

788

genotype. Data were collected in two-minute bins. Error bars represent Standard Error. (D)

789

Quantification of change in beam breaks per 2-min bin for the 10 min intervals before and after

790

the onset of the light pulse in each experiment. Bar graphs show means +/- SD. \*\*\*, p < 0.01, n=

791

3 experimental repeats with 16 flies per genotype and condition. Dead flies and those with a

792

change in activity greater than 3 deviations from the median were excluded.

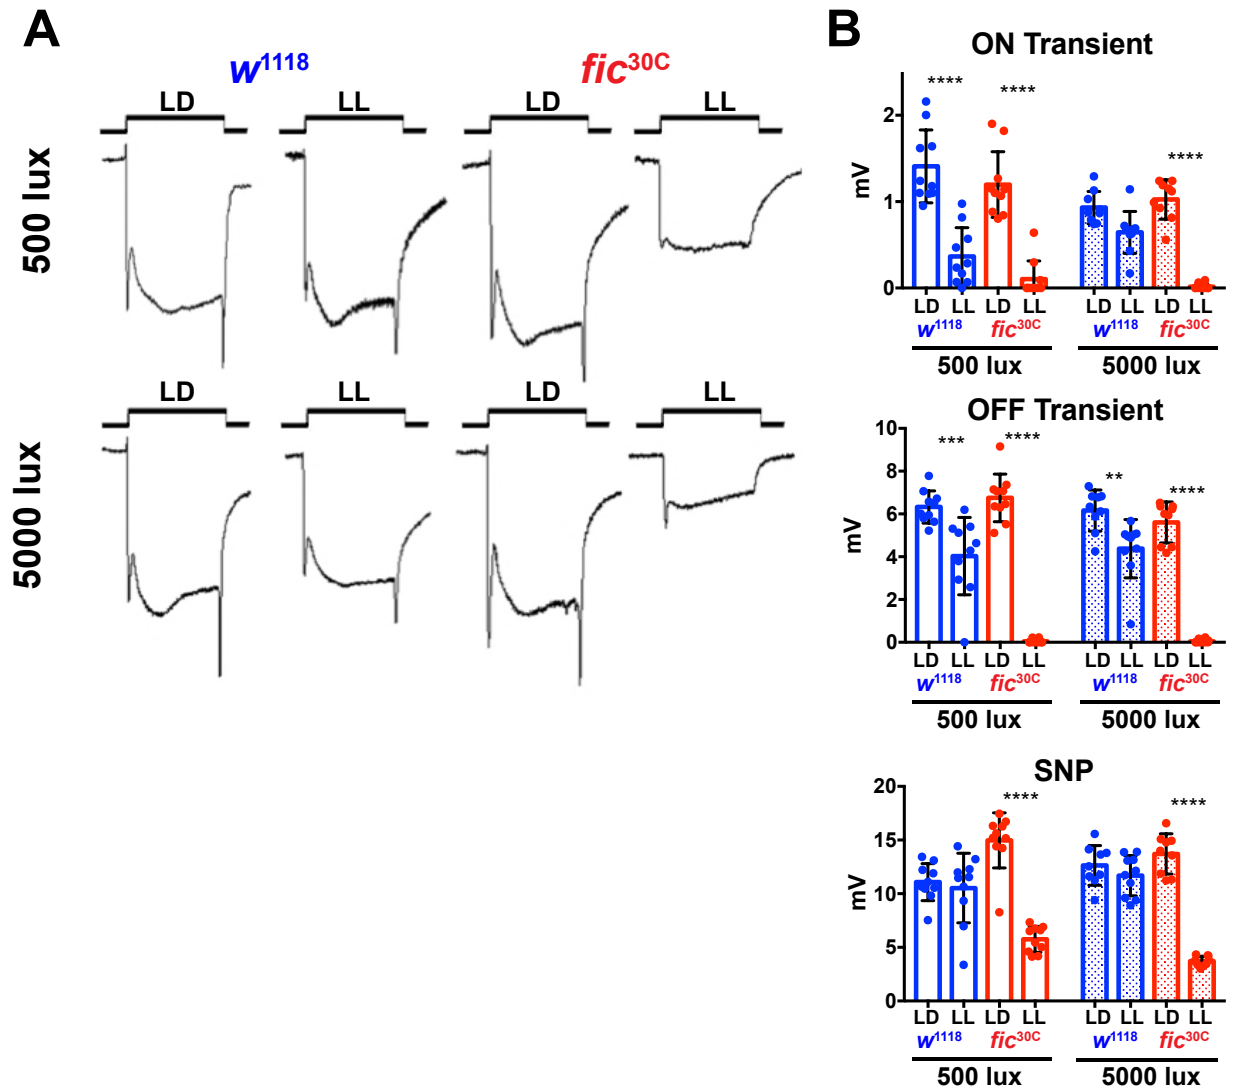

793

794

795

**Figure 3- figure supplement 2. *fic<sup>30C</sup>* mutants are sensitive to constant light, regardless of total intensity.**

796

**(A)** Representative ERGs of flies following 3 days of LL or LD with either 500 lux or 5000 lux light, showing *fic<sup>30C</sup>* null animals lose ON/OFF transients and have reduced SNPs with constant light, regardless of intensity, but under LD conditions, even at 5000 lux, have healthy ERG responses.

797

**(B)** Quantification of ERG data. Bar graphs show means +/- SD. \*\*\*\*,  $p < 0.0001$ ;

799

\*\*\*,  $p < 0.001$ ; \*,  $p < 0.05$ ;  $n = 10$  flies per genotype and condition.

800



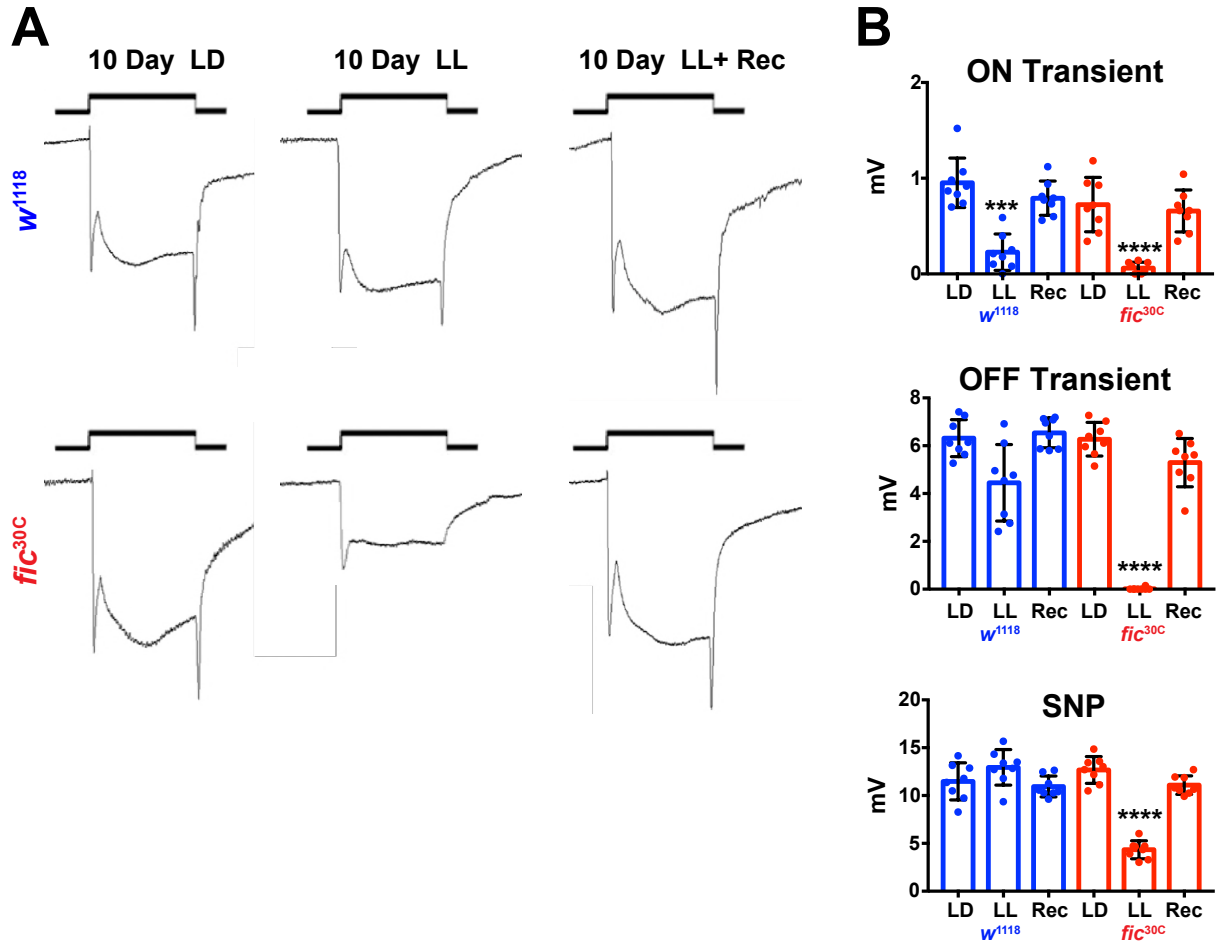

801

802 **Figure 3- figure supplement 3. *Fic<sup>30C</sup>* mutants recover ERG properties in 72 hours after 10**  
803 **days of LL.**

804 **(A)** Representative ERGs of flies following 10 days of LL, 10 days LD (500 lux), and 3 days  
805 Recovery following 10 days. **(B)** Quantification of ERG data. Bar graphs show means +/- SD.

806 \*\*\*\*,  $p < 0.0001$ ; \*\*\*,  $p < 0.001$ ; \*,  $p < 0.05$ ;  $n = 8$  flies per genotype and condition.

| Line    | RNAi Target Gene | Eye Roughness Score |        |        |        |        | Weighted Average | Number of Flies | P-Value (Fisher's) |
|---------|------------------|---------------------|--------|--------|--------|--------|------------------|-----------------|--------------------|
|         |                  | 0                   | 1      | 2      | 3      | 4      |                  |                 |                    |
| Control | None             | 0                   | 1      | 68     | 3      | 0      | 2.03             | 72              | n/a                |
| BS36815 | 4EBP             | 0                   | 0      | 96     | 0      | 0      | 2.00             | 96              | 0.032              |
| v2935   | ATF4             | Lethal              | Lethal | Lethal | Lethal | Lethal | Lethal           | Lethal          | Lethal             |
| BS25985 | ATF4             | 0                   | 0      | 51     | 98     | 0      | 2.66             | 149             | 2.20E-16           |
| BS26211 | ATF6             | 0                   | 2      | 68     | 2      | 0      | 2.00             | 72              | 1.000              |
| BS64873 | CaBP1            | 0                   | 3      | 42     | 0      | 0      | 1.93             | 45              | 0.137              |
| BS58172 | Calnexin         | 0                   | 2      | 41     | 1      | 0      | 1.98             | 44              | 0.688              |
| v7799   | eIF2a            | 0                   | 2      | 54     | 0      | 0      | 1.96             | 56              | 0.302              |
| v104562 | eIF2a            | 0                   | 0      | 48     | 0      | 0      | 2.00             | 48              | 0.388              |
| BS55657 | ergic53          | 0                   | 5      | 35     | 7      | 0      | 2.04             | 47              | 0.007              |
| BS35023 | Gadd45           | 0                   | 0      | 45     | 3      | 0      | 2.06             | 48              | 0.811              |
| BS34346 | GP93             | 0                   | 0      | 33     | 5      | 0      | 2.13             | 38              | 0.122              |
| v39561  | Ire1             | 0                   | 0      | 33     | 40     | 0      | 2.55             | 73              | 4.14E-12           |
| v39562  | Ire1             | 0                   | 0      | 15     | 47     | 0      | 2.76             | 62              | 2.20E-16           |
| BS62156 | Ire1             | 0                   | 0      | 0      | 57     | 2      | 3.03             | 59              | 2.20E-16           |
| BS36743 | Ire1             | 0                   | 0      | 0      | 14     | 13     | 3.48             | 27              | 2.20E-16           |
| BS28039 | PDI              | 0                   | 0      | 20     | 2      | 0      | 2.09             | 22              | 0.685              |
| v110278 | PERK             | 0                   | 0      | 3      | 45     | 4      | 3.02             | 52              | 2.20E-16           |
| v16427  | PERK             | 0                   | 0      | 0      | 13     | 30     | 3.70             | 43              | 2.20E-16           |
| BS35162 | PERK             | 0                   | 0      | 28     | 43     | 0      | 2.61             | 71              | 6.84E-14           |
| BS42499 | PERK             | 0                   | 0      | 26     | 65     | 50     | 3.17             | 141             | 2.20E-16           |
| BS36755 | Xbp1             | Lethal              | Lethal | Lethal | Lethal | Lethal | Lethal           | Lethal          | Lethal             |
| BS25990 | Xbp1             | Lethal              | Lethal | Lethal | Lethal | Lethal | Lethal           | Lethal          | Lethal             |

807

808 **Table 1. Genetic interactions between Fic and UPR genes.**

809 UAS<sup>Scer</sup>-driven RNAi transgenes (either TRIP or VDRC lines) were used to silence candidate  
810 UPR and ER stress-related genes in a *fic*<sup>30C/+</sup> heterozygous background, with either *LongGMR*-  
811 Gal4, UAS-Fic<sup>E247G</sup> or *LongGMR*-Gal4 only. Eye roughness was scored for individual flies and  
812 averaged for each cross. Table reports number of flies scored in each group (0=no roughness,  
813 2=mildly rough (control flies), 4= severely rough, 1 and 3 are intermediate phenotypes) and the  
814 weighted average of the eye roughness. Significance differences are highlighted in yellow, and  
815 p-value's were determined using Fisher's Exact Test for categorical data, comparing the effects  
816 of each gene knockdown with the control group (**top line**, *fic*<sup>30C/+</sup>; *LongGMR*-Gal4, UAS-  
817 Fic<sup>E247G</sup>). Interactions were considered significant for any individual test if  $p < 0.003$  as  
818 determined using Bonferroni's multiple comparison adjustment.
